# Supplementary material for: Quantitative Trait Locus Mapping of Marsh Spot Disease Resistance in Cranberry Common Bean (Phaseolus vulgaris L.)
Source: MDPI journal article supplement (doi:10.3390/ijms23147639), 2022-07-11
Supplement: s1 [file s1]

**Table S4.**  $R^2$  of 16 quantitative trait loci (QTL) across 5 years and two soil types (sandy and heavy clay).

| Dataset/Q  | QTL.1.1 | QTL.2.1  | QTL.2.2   | QTL.2.3   | QTL.2.4   | QTL.2.5   | QTL.2.6   | QTL.3.1   | QTL.3.2   | QTL.5.1  | QTL.5.2   | QTL.5.3   | QTL.5.4   | QTL.6.1 | QTL.6.2  |
|------------|---------|----------|-----------|-----------|-----------|-----------|-----------|-----------|-----------|----------|-----------|-----------|-----------|---------|----------|
| H2015      | 4.58    | 6.52 *   | 7.88 ***  | 10.48 **  | 10.58 *** | 9.59 **   | 9.15 **   | 27.3 ***  | 24.99 *** | 4.71 *   | 5.74 *    | 10.32 *** | 6.65 *    | 1.71    | 2.61     |
| H2016      | 2.81    | 7.3 *    | 9 ***     | 9.87 **   | 9.88 ***  | 9.49 **   | 11.47 *** | 18.7 ***  | 17.27 *** | 0.73     | 11.74 *** | 7.54 **   | 6.99 *    | 8.21 ** | 2.02     |
| H2017      | 5.37    | 4.13     | 12.04 *** | 11.83 *** | 11.64 *** | 10.21 *** | 10.26 **  | 15.83 **  | 14.41 *** | 2.81     | 10.13 **  | 6.6 **    | 10.89 **  | 8.16 ** | 6.06 *   |
| H2018      | 3.29    | 8.83 **  | 8.41 ***  | 10.8 **   | 10.28 *** | 11.32 *** | 9.72 **   | 13.49 *   | 11.76 *** | 0.81     | 5.78 *    | 4.79 **   | 13.07 *** | 1.92    | 2.42     |
| H2019      | 3.86    | 2.96     | 8.12 ***  | 11.81 *** | 12.53 *** | 13.21 *** | 12.81 *** | 17.26 **  | 14.15 *** | 6.25 *   | 7.55 *    | 0.77      | 12.45 *** | 5.53 *  | 9.14 **  |
| S2015      | 3.16    | 1.49     | 6.39 **   | 8.24 **   | 8.22 **   | 6.04 *    | 13.42 *** | 43.92 *** | 42 ***    | 10.3 *** | 7.92 *    | 6.86 **   | 12.2 ***  | 6.72 ** | 6.34 *   |
| S2016      | 3.93    | 7.27 *   | 11.18 *** | 12.49 *** | 11.27 *** | 8.51 **   | 13.92 *** | 26.14 *** | 19.22 *** | 1.11     | 10.22 **  | 9.82 ***  | 7.43 *    | 2.16    | 2.55     |
| S2017      | 5.06    | 10.81 ** | 4.97 **   | 7 *       | 4.61 *    | 5.59 *    | 8.74 **   | 16.82 **  | 15.54 *** | 1.59     | 7.1 *     | 21.69 *** | 9.94 **   | 4.42 *  | 1.69     |
| S2018      | 4.29    | 4.57     | 1.55      | 3.8       | 4.52 *    | 2.09      | 6.71 *    | 27.48 *** | 22.03 *** | 3.19     | 7.58 *    | 10.92 *** | 10.55 **  | 9.27 ** | 6.01 *   |
| S2019      | 4.84    | 3.83     | 4.67 *    | 5.28      | 5.02 *    | 5.75 *    | 11.04 **  | 5.28      | 1.5       | 0.93     | 7.96 *    | 11.11 *** | 5.39      | 4.07    | 4.01     |
| T2015      | 3.94    | 4.52     | 8.86 ***  | 11.59 *** | 11.61 *** | 9.69 **   | 12.25 *** | 39.01 *** | 38.14 *** | 8.31 **  | 7.92 *    | 10.58 *** | 10.74 **  | 4.25    | 4.75     |
| T2016      | 3.95    | 8.57 **  | 12.42 *** | 13.79 *** | 12.98 *** | 10.64 *** | 15.47 *** | 25.15 *** | 22.04 *** | 0.96     | 12.63 *** | 10.37 *** | 8.54 **   | 4.87 *  | 2.74     |
| T2017      | 5.9 *   | 9.39 **  | 10.38 *** | 10.71 **  | 9.8 ***   | 9.58 **   | 11.98 *** | 21.08 *** | 19.67 *** | 2.36     | 10.85 **  | 17.9 ***  | 13.67 *** | 7.73 ** | 3.49     |
| T2018      | 5.14    | 9.37 **  | 7.06 **   | 10.48 **  | 10.69 *** | 9.22 **   | 10.21 **  | 23.34 *** | 20.45 *** | 2.03     | 8.12 **   | 9.91 ***  | 16.29 *** | 6.05 *  | 5.28     |
| T2019      | 5.98 *  | 4.86     | 10.08 *** | 12.69 *** | 12.97 *** | 14.33 *** | 16.31 *** | 16.58 **  | 11.58 *** | 2.77     | 10.19 **  | 5.03 **   | 13.7 ***  | 7.44 ** | 10.06 ** |
| H-5 yrs    | 4.95    | 7.4 *    | 12.77 *** | 15.81 *** | 15.94 *** | 15.42 *** | 15.09 *** | 23.47 *** | 22.01 *** | 3.61     | 9.99 **   | 7.02 **   | 13.83 *** | 5.4 *   | 5.49     |
| S-5 yrs    | 5.32    | 7.36 *   | 8.53 ***  | 10.4 **   | 10.03 *** | 8.16 **   | 16.27 *** | 31.1 ***  | 27.29 *** | 3.45     | 12.31 *** | 18.51 *** | 14.48 *** | 7.64 ** | 5.11     |
| Overall    | 5.87 *  | 8.44 **  | 12.24 *** | 14.86 *** | 14.94 *** | 13.53 *** | 16.52 *** | 30.1 ***  | 27.73 *** | 3.86     | 12.44 *** | 13.19 *** | 16.02 *** | 7.08 ** | 5.54     |
| Mean $R^2$ | 5.92    | 8.30     | 9.12      | 11.43     | 10.42     | 10.02     | 12.30     | 24.52     | 21.78     | 7.39     | 9.23      | 10.72     | 11.61     | 6.81    | 7.52     |

Note: \*,  $p < 0.05$ ; \*\*,  $p < 0.01$ ; \*\*\*,  $p < 0.001$ , mean  $R^2$  values were calculated from those datasets which were significant correlation with QTL.

| <i>QTL.9.1</i> | Mean $R^2$ |
|----------------|------------|
| 0.27           | 8.42       |
| 2.12           | 8.20       |
| 0.48           | 8.30       |
| 4.28           | 7.18       |
| 0.07           | 8.15       |
| 1.6            | 10.91      |
| 1.79           | 8.93       |
| 9.67 **        | 7.96       |
| 6.51 *         | 7.72       |
| 3.77           | 5.00       |
| 0.69           | 11.00      |
| 2.29           | 10.09      |
| 4.35           | 9.94       |
| 7.27 *         | 9.48       |
| 0.66           | 9.14       |
| 1.03           | 10.56      |
| 4.23           | 11.22      |
| 2.35           | 12.07      |
| 7.82           | 10.54      |
