# Supplementary material for: Quantitative Trait Locus Mapping of Marsh Spot Disease Resistance in Cranberry Common Bean (Phaseolus vulgaris L.)
Source: MDPI journal article supplement (doi:10.3390/ijms23147639), 2022-07-11
Supplement: s1 [file s1]

**Table S3.** Linkage map of the cranberry common bean population.

| Marker         | Linkage group/Chromosome | Genetic distance (cM) |
|----------------|--------------------------|-----------------------|
| Chr01_42769729 | 1                        | 0.0000                |
| Chr01_5061855  | 1                        | 37.9237               |
| Chr01_7241113  | 1                        | 45.9692               |
| Chr01_7241242  | 1                        | 45.9692               |
| Chr01_7241235  | 1                        | 45.9692               |
| Chr01_16667853 | 1                        | 55.5682               |
| Chr01_12100110 | 1                        | 64.6408               |
| Chr01_12100213 | 1                        | 64.6408               |
| Chr01_12100235 | 1                        | 64.6408               |
| Chr01_51347302 | 1                        | 75.3269               |
| Chr01_51347327 | 1                        | 75.3269               |
| Chr01_51347328 | 1                        | 75.3269               |
| Chr01_39057535 | 1                        | 98.7837               |
| Chr01_39057596 | 1                        | 126.2490              |
| Chr01_39057474 | 1                        | 126.2490              |
| Chr01_39057670 | 1                        | 130.5906              |
| Chr01_39057649 | 1                        | 136.7186              |
| Chr01_39057611 | 1                        | 141.0602              |
| Chr01_39057542 | 1                        | 141.0602              |
| Chr01_39057613 | 1                        | 145.4018              |
| Chr01_39057478 | 1                        | 145.4018              |
| Chr01_39057463 | 1                        | 145.7668              |
| Chr01_16667945 | 1                        | 156.4529              |
| Chr01_16667895 | 1                        | 156.4529              |
| Chr01_16667780 | 1                        | 156.4529              |
| Chr01_19096761 | 1                        | 172.7176              |
| Chr01_50073577 | 1                        | 218.6228              |
| Chr01_50073461 | 1                        | 219.3582              |
| Chr01_50187545 | 1                        | 220.0936              |
| Chr01_50146664 | 1                        | 220.0936              |
| Chr01_50146614 | 1                        | 220.0936              |
| Chr01_50089253 | 1                        | 220.8289              |
| Chr01_49935014 | 1                        | 221.5643              |
| Chr01_49935466 | 1                        | 221.5643              |
| Chr01_49835865 | 1                        | 221.9292              |
| Chr01_49872051 | 1                        | 222.2942              |
| Chr01_49835661 | 1                        | 222.6592              |
| Chr01_49827999 | 1                        | 222.6592              |
| Chr01_49613932 | 1                        | 223.0242              |
| Chr01_49751864 | 1                        | 223.0242              |
| Chr01_49751816 | 1                        | 223.0242              |
| Chr01_49614011 | 1                        | 223.0242              |

| Marker         | Linkage group/Chromosome | Genetic distance (cM) |
|----------------|--------------------------|-----------------------|
| Chr01_49614124 | 1                        | 223.0242              |
| Chr01_49578497 | 1                        | 223.0242              |
| Chr01_49578559 | 1                        | 223.0242              |
| Chr01_49697591 | 1                        | 223.3891              |
| Chr01_49751572 | 1                        | 223.7541              |
| Chr01_49570323 | 1                        | 224.1191              |
| Chr01_49570583 | 1                        | 224.1191              |
| Chr01_49760004 | 1                        | 224.1191              |
| Chr01_49421547 | 1                        | 224.8544              |
| Chr01_49474021 | 1                        | 224.8544              |
| Chr01_49421615 | 1                        | 224.8544              |
| Chr01_49421625 | 1                        | 224.8544              |
| Chr01_49407901 | 1                        | 225.2194              |
| Chr01_49407964 | 1                        | 225.2194              |
| Chr01_49407955 | 1                        | 225.2194              |
| Chr01_49407886 | 1                        | 225.2194              |
| Chr01_49407903 | 1                        | 225.2194              |
| Chr01_48445107 | 1                        | 229.5610              |
| Chr01_6984988  | 1                        | 267.7124              |
| Chr01_7310409  | 1                        | 268.4478              |
| Chr01_7172287  | 1                        | 268.4478              |
| Chr01_7288896  | 1                        | 268.4478              |
| Chr01_7172201  | 1                        | 268.4478              |
| Chr01_7633947  | 1                        | 268.8127              |
| Chr01_7634185  | 1                        | 268.8127              |
| Chr01_7634098  | 1                        | 268.8127              |
| Chr01_7172290  | 1                        | 269.1777              |
| Chr01_7692245  | 1                        | 269.9130              |
| Chr01_6696033  | 1                        | 270.6484              |
| Chr01_6696281  | 1                        | 270.6484              |
| Chr01_6696388  | 1                        | 270.6484              |
| Chr01_6696365  | 1                        | 270.6484              |
| Chr01_6904739  | 1                        | 271.0133              |
| Chr01_6904721  | 1                        | 271.0133              |
| Chr01_6696371  | 1                        | 271.3783              |
| Chr01_6463712  | 1                        | 271.7433              |
| Chr01_6463766  | 1                        | 271.7433              |
| Chr01_6464042  | 1                        | 271.7433              |
| Chr01_6463698  | 1                        | 271.7433              |
| Chr01_6464097  | 1                        | 271.7433              |
| Chr01_6550303  | 1                        | 271.7433              |
| Chr01_6018364  | 1                        | 272.8546              |
| Chr01_5762485  | 1                        | 273.2195              |

| Marker         | Linkage group/Chromosome | Genetic distance (cM) |
|----------------|--------------------------|-----------------------|
| Chr01_5762498  | 1                        | 273.2195              |
| Chr01_5762486  | 1                        | 273.2195              |
| Chr01_5762493  | 1                        | 273.2195              |
| Chr01_5762497  | 1                        | 273.2195              |
| Chr01_5762374  | 1                        | 273.2195              |
| Chr01_5571051  | 1                        | 273.5845              |
| Chr01_5335920  | 1                        | 274.6958              |
| Chr01_5381282  | 1                        | 274.6958              |
| Chr01_5381281  | 1                        | 274.6958              |
| Chr01_5381243  | 1                        | 274.6958              |
| Chr01_5335659  | 1                        | 274.6958              |
| Chr01_5335701  | 1                        | 274.6958              |
| Chr01_5381283  | 1                        | 274.6958              |
| Chr01_5381635  | 1                        | 274.6958              |
| Chr01_4971637  | 1                        | 274.6958              |
| Chr01_4978730  | 1                        | 274.6958              |
| Chr01_4980226  | 1                        | 274.6958              |
| Chr01_4980543  | 1                        | 274.6958              |
| Chr01_4980560  | 1                        | 274.6958              |
| Chr01_5003294  | 1                        | 274.6958              |
| Chr01_4971629  | 1                        | 274.6958              |
| Chr01_4971719  | 1                        | 274.6958              |
| Chr01_5332964  | 1                        | 274.6958              |
| Chr01_5332883  | 1                        | 274.6958              |
| Chr01_4978868  | 1                        | 275.0607              |
| Chr01_5332959  | 1                        | 275.4257              |
| Chr01_5399214  | 1                        | 275.7906              |
| Chr01_5399181  | 1                        | 275.7906              |
| Chr01_5399463  | 1                        | 275.7906              |
| Chr01_5399177  | 1                        | 275.7906              |
| Chr01_5399202  | 1                        | 275.7906              |
| Chr01_5399170  | 1                        | 275.7906              |
| Chr01_5399185  | 1                        | 275.7906              |
| Chr01_5399146  | 1                        | 275.7906              |
| Chr01_5399482  | 1                        | 275.7906              |
| Chr01_5399159  | 1                        | 275.7906              |
| Chr01_5399147  | 1                        | 275.7906              |
| Chr01_35896759 | 1                        | 409.4055              |
| Chr01_35896769 | 1                        | 409.4055              |
| Chr01_51347326 | 1                        | 424.9852              |
| Chr01_51347337 | 1                        | 424.9852              |
| Chr01_51347346 | 1                        | 424.9852              |
| Chr01_49375521 | 1                        | 434.5841              |

| Marker         | Linkage group/Chromosome | Genetic distance (cM) |
|----------------|--------------------------|-----------------------|
| Chr01_49375512 | 1                        | 434.5841              |
| Chr01_49375506 | 1                        | 434.5841              |
| Chr01_49375484 | 1                        | 434.5841              |
| Chr01_49375446 | 1                        | 434.5841              |
| Chr01_49375435 | 1                        | 434.5841              |
| Chr01_50187716 | 1                        | 436.4647              |
| Chr01_50187694 | 1                        | 436.4647              |
| Chr01_39300039 | 1                        | 443.5363              |
| Chr01_1786889  | 1                        | 446.2106              |
| Chr01_24267201 | 1                        | 447.3219              |
| Chr01_24267262 | 1                        | 447.3219              |
| Chr01_19096806 | 1                        | 467.8575              |
| Chr01_7811494  | 1                        | 479.6801              |
| Chr01_14942797 | 1                        | 489.2791              |
| Chr01_14942783 | 1                        | 489.2791              |
| Chr01_14942877 | 1                        | 489.2791              |
| Chr01_14942878 | 1                        | 489.2791              |
| Chr01_14942887 | 1                        | 489.2791              |
| Chr01_14942915 | 1                        | 489.2791              |
| Chr01_14942929 | 1                        | 489.2791              |
| Chr01_27684594 | 1                        | 496.3506              |
| Chr01_27684614 | 1                        | 496.3506              |
| Chr01_36201895 | 1                        | 501.5695              |
| Chr01_36201894 | 1                        | 501.5695              |
| Chr01_41948777 | 1                        | 502.3049              |
| Chr01_5045698  | 1                        | 507.9742              |
| Chr01_5045706  | 1                        | 507.9742              |
| Chr01_2270786  | 1                        | 514.6860              |
| Chr01_47182580 | 1                        | 517.7668              |
| Chr01_16769433 | 1                        | 525.3239              |
| Chr01_29187090 | 1                        | 560.0505              |
| Chr01_29187107 | 1                        | 560.0505              |
| Chr01_29187133 | 1                        | 560.0505              |
| Chr01_29187198 | 1                        | 560.0505              |
| Chr01_29187199 | 1                        | 560.0505              |
| Chr01_29187211 | 1                        | 560.0505              |
| Chr01_24577991 | 1                        | 577.0194              |
| Chr01_42769731 | 1                        | 586.0920              |
| Chr01_43822756 | 1                        | 587.5850              |
| Chr01_43822395 | 1                        | 603.8497              |
| Chr01_49697127 | 1                        | 637.4431              |
| Chr01_49751789 | 1                        | 658.2659              |
| Chr01_49751621 | 1                        | 658.2659              |

| Marker         | Linkage group/Chromosome | Genetic distance (cM) |
|----------------|--------------------------|-----------------------|
| Chr01_49724122 | 1                        | 658.2659              |
| Chr01_49760375 | 1                        | 658.6309              |
| Chr01_48339634 | 1                        | 664.7589              |
| Chr02_47493692 | 2                        | 0.0000                |
| Chr02_47505908 | 2                        | 0.0000                |
| Chr02_47566896 | 2                        | 0.3650                |
| Chr02_49004261 | 2                        | 8.9221                |
| Chr02_49150877 | 2                        | 9.6575                |
| Chr02_49087605 | 2                        | 9.6575                |
| Chr02_49439377 | 2                        | 10.3928               |
| Chr02_49439157 | 2                        | 10.3928               |
| Chr02_49439131 | 2                        | 10.3928               |
| Chr02_49439125 | 2                        | 10.3928               |
| Chr02_49419053 | 2                        | 10.3928               |
| Chr02_49419044 | 2                        | 10.3928               |
| Chr02_49419041 | 2                        | 10.3928               |
| Chr02_49419004 | 2                        | 10.3928               |
| Chr02_49418965 | 2                        | 10.3928               |
| Chr02_49418952 | 2                        | 10.3928               |
| Chr02_49418943 | 2                        | 10.3928               |
| Chr02_49418914 | 2                        | 10.3928               |
| Chr02_49401224 | 2                        | 10.7578               |
| Chr02_49401074 | 2                        | 10.7578               |
| Chr02_48767314 | 2                        | 19.3149               |
| Chr02_48767236 | 2                        | 19.3149               |
| Chr02_49020237 | 2                        | 19.6799               |
| Chr02_48705285 | 2                        | 20.0449               |
| Chr02_48823690 | 2                        | 27.6019               |
| Chr02_48767503 | 2                        | 35.1589               |
| Chr02_48545931 | 2                        | 35.5239               |
| Chr02_48552811 | 2                        | 35.5239               |
| Chr02_48552814 | 2                        | 35.5239               |
| Chr02_48640313 | 2                        | 35.5239               |
| Chr02_48643618 | 2                        | 35.5239               |
| Chr02_48643786 | 2                        | 35.5239               |
| Chr02_48645240 | 2                        | 35.5239               |
| Chr02_43048091 | 2                        | 49.1546               |
| Chr02_38560323 | 2                        | 56.2261               |
| Chr02_41751936 | 2                        | 61.4450               |
| Chr02_41751909 | 2                        | 61.4450               |
| Chr02_41751898 | 2                        | 61.4450               |
| Chr02_41751876 | 2                        | 61.4450               |
| Chr02_41751830 | 2                        | 61.4450               |

| Marker         | Linkage group/Chromosome | Genetic distance (cM) |
|----------------|--------------------------|-----------------------|
| Chr02_41751825 | 2                        | 61.4450               |
| Chr02_41751803 | 2                        | 61.4450               |
| Chr02_41751794 | 2                        | 61.4450               |
| Chr02_41751774 | 2                        | 61.4450               |
| Chr02_41751938 | 2                        | 61.4450               |
| Chr02_35369867 | 2                        | 67.1143               |
| Chr02_37745825 | 2                        | 72.7837               |
| Chr02_48949927 | 2                        | 75.0580               |
| Chr02_10310986 | 2                        | 83.1100               |
| Chr02_18403464 | 2                        | 94.9327               |
| Chr02_765970   | 2                        | 111.9017              |
| Chr02_872596   | 2                        | 150.0531              |
| Chr02_872663   | 2                        | 150.0531              |
| Chr02_872686   | 2                        | 150.0531              |
| Chr02_1135128  | 2                        | 155.2719              |
| Chr02_1651431  | 2                        | 162.3435              |
| Chr02_1485115  | 2                        | 165.0178              |
| Chr02_1931208  | 2                        | 168.0986              |
| Chr02_3204228  | 2                        | 184.3633              |
| Chr02_3204321  | 2                        | 184.3633              |
| Chr02_3204150  | 2                        | 184.3633              |
| Chr02_3204334  | 2                        | 184.3633              |
| Chr02_3299297  | 2                        | 185.8563              |
| Chr02_3288300  | 2                        | 185.8563              |
| Chr02_3459027  | 2                        | 186.5916              |
| Chr02_3518930  | 2                        | 187.7029              |
| Chr02_3958350  | 2                        | 192.4793              |
| Chr02_16239727 | 2                        | 203.7272              |
| Chr02_22611601 | 2                        | 205.2202              |
| Chr02_25620016 | 2                        | 209.9966              |
| Chr02_25847345 | 2                        | 210.7320              |
| Chr02_26534346 | 2                        | 214.6462              |
| Chr02_26534185 | 2                        | 215.3815              |
| Chr02_26480656 | 2                        | 219.7231              |
| Chr02_26128905 | 2                        | 219.7231              |
| Chr02_27099042 | 2                        | 220.0881              |
| Chr02_26698961 | 2                        | 220.4531              |
| Chr02_29016823 | 2                        | 224.7947              |
| Chr02_31959417 | 2                        | 235.4808              |
| Chr02_32113326 | 2                        | 239.8223              |
| Chr02_32252177 | 2                        | 240.1873              |
| Chr02_31873402 | 2                        | 242.0679              |
| Chr02_34643227 | 2                        | 255.0813              |

| Marker         | Linkage group/Chromosome | Genetic distance (cM) |
|----------------|--------------------------|-----------------------|
| Chr02_34643222 | 2                        | 263.1334              |
| Chr02_36996368 | 2                        | 280.1023              |
| Chr02_35065692 | 2                        | 288.6595              |
| Chr02_35065730 | 2                        | 290.1525              |
| Chr02_35071119 | 2                        | 290.1525              |
| Chr02_34969601 | 2                        | 290.5174              |
| Chr02_34428762 | 2                        | 291.6287              |
| Chr02_34518761 | 2                        | 291.6287              |
| Chr02_35071123 | 2                        | 293.1217              |
| Chr02_35071362 | 2                        | 293.1217              |
| Chr02_35130486 | 2                        | 293.8571              |
| Chr02_35131947 | 2                        | 294.2220              |
| Chr02_35289581 | 2                        | 294.9574              |
| Chr02_35369945 | 2                        | 294.9574              |
| Chr02_35245635 | 2                        | 295.3223              |
| Chr02_36348041 | 2                        | 295.6873              |
| Chr02_35423190 | 2                        | 296.0522              |
| Chr02_36353571 | 2                        | 296.4172              |
| Chr02_35423272 | 2                        | 296.7822              |
| Chr02_35437425 | 2                        | 296.7822              |
| Chr02_35560502 | 2                        | 296.7822              |
| Chr02_35926043 | 2                        | 296.7822              |
| Chr02_36209958 | 2                        | 296.7822              |
| Chr02_36210024 | 2                        | 296.7822              |
| Chr02_36317988 | 2                        | 296.7822              |
| Chr02_36348037 | 2                        | 296.7822              |
| Chr02_36308667 | 2                        | 297.1471              |
| Chr02_36348048 | 2                        | 297.5121              |
| Chr02_35437883 | 2                        | 297.8770              |
| Chr02_36328647 | 2                        | 298.2420              |
| Chr02_35925992 | 2                        | 298.6070              |
| Chr02_35926013 | 2                        | 298.6070              |
| Chr02_36137891 | 2                        | 299.3423              |
| Chr02_35344261 | 2                        | 305.9377              |
| Chr02_36750706 | 2                        | 311.1566              |
| Chr02_36996796 | 2                        | 313.4308              |
| Chr02_36996756 | 2                        | 313.4308              |
| Chr02_36996709 | 2                        | 313.4308              |
| Chr02_36996658 | 2                        | 313.4308              |
| Chr02_36853901 | 2                        | 313.4308              |
| Chr02_36853822 | 2                        | 313.4308              |
| Chr02_37485770 | 2                        | 314.1662              |
| Chr02_37531627 | 2                        | 314.5312              |

| Marker         | Linkage group/Chromosome | Genetic distance (cM) |
|----------------|--------------------------|-----------------------|
| Chr02_37504592 | 2                        | 314.5312              |
| Chr02_37504412 | 2                        | 314.8961              |
| Chr02_37504523 | 2                        | 314.8961              |
| Chr02_37504524 | 2                        | 314.8961              |
| Chr02_37549888 | 2                        | 314.8961              |
| Chr02_37564453 | 2                        | 314.8961              |
| Chr02_37564498 | 2                        | 314.8961              |
| Chr02_37616759 | 2                        | 314.8961              |
| Chr02_37616866 | 2                        | 314.8961              |
| Chr02_37616875 | 2                        | 314.8961              |
| Chr02_37616878 | 2                        | 314.8961              |
| Chr02_37616898 | 2                        | 314.8961              |
| Chr02_37819201 | 2                        | 315.6315              |
| Chr02_37809753 | 2                        | 315.6315              |
| Chr02_38311276 | 2                        | 315.9964              |
| Chr02_38422194 | 2                        | 316.3614              |
| Chr02_38422210 | 2                        | 316.3614              |
| Chr02_38422327 | 2                        | 316.3614              |
| Chr02_38422398 | 2                        | 316.3614              |
| Chr02_38198469 | 2                        | 316.7263              |
| Chr02_37937595 | 2                        | 317.0913              |
| Chr02_37937660 | 2                        | 317.4563              |
| Chr02_37937641 | 2                        | 317.4563              |
| Chr02_37937590 | 2                        | 317.4563              |
| Chr02_37874656 | 2                        | 317.4563              |
| Chr02_38647911 | 2                        | 317.8212              |
| Chr02_38452857 | 2                        | 318.1862              |
| Chr02_38564863 | 2                        | 318.5511              |
| Chr02_37937763 | 2                        | 322.4654              |
| Chr02_38638752 | 2                        | 326.3796              |
| Chr02_38512866 | 2                        | 326.7445              |
| Chr02_38777790 | 2                        | 327.1095              |
| Chr02_38777589 | 2                        | 327.1095              |
| Chr02_38987232 | 2                        | 327.4745              |
| Chr02_38987220 | 2                        | 327.4745              |
| Chr02_38716362 | 2                        | 327.4745              |
| Chr02_38716176 | 2                        | 327.4745              |
| Chr02_39106796 | 2                        | 327.8394              |
| Chr02_39498546 | 2                        | 328.5748              |
| Chr02_39410117 | 2                        | 328.5748              |
| Chr02_39365564 | 2                        | 328.9397              |
| Chr02_39636012 | 2                        | 329.6751              |
| Chr02_39784499 | 2                        | 330.7864              |



| Marker         | Linkage group/Chromosome | Genetic distance (cM) |
|----------------|--------------------------|-----------------------|
| Chr02_39912603 | 2                        | 330.7864              |
| Chr02_39842055 | 2                        | 330.7864              |
| Chr02_39842219 | 2                        | 330.7864              |
| Chr02_40090205 | 2                        | 331.8977              |
| Chr02_40090218 | 2                        | 331.8977              |
| Chr02_40090290 | 2                        | 331.8977              |
| Chr02_40477512 | 2                        | 332.6330              |
| Chr02_40477223 | 2                        | 332.6330              |
| Chr02_40364251 | 2                        | 332.6330              |
| Chr02_40356240 | 2                        | 332.6330              |
| Chr02_40356238 | 2                        | 332.6330              |
| Chr02_40356197 | 2                        | 332.6330              |
| Chr02_40356129 | 2                        | 332.6330              |
| Chr02_40356128 | 2                        | 332.6330              |
| Chr02_40731868 | 2                        | 333.3684              |
| Chr02_40607945 | 2                        | 333.7333              |
| Chr02_40607973 | 2                        | 333.7333              |
| Chr02_40608067 | 2                        | 333.7333              |
| Chr02_40725222 | 2                        | 334.0983              |
| Chr02_40723162 | 2                        | 334.4633              |
| Chr02_40723188 | 2                        | 334.4633              |
| Chr02_40724633 | 2                        | 334.8282              |
| Chr02_40718639 | 2                        | 334.8282              |
| Chr02_40693115 | 2                        | 334.8282              |
| Chr02_41214122 | 2                        | 335.1932              |
| Chr02_40844547 | 2                        | 335.5581              |
| Chr02_40828839 | 2                        | 335.5581              |
| Chr02_40828837 | 2                        | 335.5581              |
| Chr02_40718552 | 2                        | 335.9231              |
| Chr02_41084202 | 2                        | 335.9231              |
| Chr02_41084334 | 2                        | 335.9231              |
| Chr02_41084337 | 2                        | 335.9231              |
| Chr02_41106574 | 2                        | 335.9231              |
| Chr02_41106594 | 2                        | 335.9231              |
| Chr02_41115157 | 2                        | 335.9231              |
| Chr02_41115176 | 2                        | 335.9231              |
| Chr02_41115231 | 2                        | 335.9231              |
| Chr02_41172368 | 2                        | 335.9231              |
| Chr02_42072411 | 2                        | 336.2881              |
| Chr02_41370410 | 2                        | 339.3689              |
| Chr02_41370426 | 2                        | 339.3689              |
| Chr02_41656959 | 2                        | 342.0432              |
| Chr02_42072366 | 2                        | 342.4081              |

| Marker         | Linkage group/Chromosome | Genetic distance (cM) |
|----------------|--------------------------|-----------------------|
| Chr02_41992594 | 2                        | 342.4081              |
| Chr02_41982208 | 2                        | 342.4081              |
| Chr02_41858262 | 2                        | 342.4081              |
| Chr02_41858233 | 2                        | 342.4081              |
| Chr02_41857913 | 2                        | 342.4081              |
| Chr02_41857883 | 2                        | 342.4081              |
| Chr02_41857849 | 2                        | 342.4081              |
| Chr02_41812032 | 2                        | 342.4081              |
| Chr02_41811814 | 2                        | 342.4081              |
| Chr02_41748916 | 2                        | 342.4081              |
| Chr02_41748862 | 2                        | 342.4081              |
| Chr02_41748763 | 2                        | 342.4081              |
| Chr02_41748716 | 2                        | 342.4081              |
| Chr02_41734275 | 2                        | 342.4081              |
| Chr02_41687982 | 2                        | 342.4081              |
| Chr02_41687965 | 2                        | 342.4081              |
| Chr02_41687924 | 2                        | 342.4081              |
| Chr02_41664674 | 2                        | 342.4081              |
| Chr02_41507256 | 2                        | 342.4081              |
| Chr02_41506661 | 2                        | 342.4081              |
| Chr02_41502354 | 2                        | 342.4081              |
| Chr02_41469102 | 2                        | 342.4081              |
| Chr02_41469051 | 2                        | 342.4081              |
| Chr02_41468850 | 2                        | 342.4081              |
| Chr02_41468848 | 2                        | 342.4081              |
| Chr02_41468840 | 2                        | 342.4081              |
| Chr02_41379499 | 2                        | 342.4081              |
| Chr02_41379400 | 2                        | 342.4081              |
| Chr02_41365674 | 2                        | 342.4081              |
| Chr02_42199175 | 2                        | 342.7731              |
| Chr02_42199058 | 2                        | 342.7731              |
| Chr02_42160137 | 2                        | 342.7731              |
| Chr02_42141432 | 2                        | 342.7731              |
| Chr02_42141416 | 2                        | 342.7731              |
| Chr02_42111265 | 2                        | 342.7731              |
| Chr02_42111206 | 2                        | 342.7731              |
| Chr02_42106827 | 2                        | 342.7731              |
| Chr02_42106819 | 2                        | 342.7731              |
| Chr02_42106772 | 2                        | 342.7731              |
| Chr02_42106750 | 2                        | 342.7731              |
| Chr02_42106744 | 2                        | 342.7731              |
| Chr02_42317718 | 2                        | 343.5084              |
| Chr02_42437618 | 2                        | 345.3890              |

| Marker         | Linkage group/Chromosome | Genetic distance (cM) |
|----------------|--------------------------|-----------------------|
| Chr02_42313917 | 2                        | 347.6633              |
| Chr02_42413489 | 2                        | 348.3987              |
| Chr02_42437630 | 2                        | 349.1340              |
| Chr02_42609107 | 2                        | 349.4990              |
| Chr02_42478967 | 2                        | 349.8639              |
| Chr02_42479044 | 2                        | 349.8639              |
| Chr02_42479063 | 2                        | 349.8639              |
| Chr02_42479136 | 2                        | 349.8639              |
| Chr02_42479142 | 2                        | 349.8639              |
| Chr02_42479145 | 2                        | 349.8639              |
| Chr02_42479155 | 2                        | 349.8639              |
| Chr02_42522538 | 2                        | 349.8639              |
| Chr02_42603419 | 2                        | 349.8639              |
| Chr02_42603436 | 2                        | 349.8639              |
| Chr02_42603672 | 2                        | 349.8639              |
| Chr02_42603695 | 2                        | 349.8639              |
| Chr02_42605734 | 2                        | 349.8639              |
| Chr02_42608152 | 2                        | 349.8639              |
| Chr02_42611377 | 2                        | 349.8639              |
| Chr02_42963945 | 2                        | 350.2289              |
| Chr02_43129030 | 2                        | 350.9642              |
| Chr02_43129069 | 2                        | 350.9642              |
| Chr02_42812287 | 2                        | 351.6996              |
| Chr02_43129392 | 2                        | 352.0645              |
| Chr02_42963996 | 2                        | 352.4295              |
| Chr02_42965340 | 2                        | 352.4295              |
| Chr02_42965628 | 2                        | 352.4295              |
| Chr02_43008043 | 2                        | 352.4295              |
| Chr02_43008433 | 2                        | 352.4295              |
| Chr02_43020459 | 2                        | 352.4295              |
| Chr02_43020474 | 2                        | 352.4295              |
| Chr02_43020475 | 2                        | 352.4295              |
| Chr02_43020477 | 2                        | 352.4295              |
| Chr02_43020540 | 2                        | 352.4295              |
| Chr02_43039022 | 2                        | 352.4295              |
| Chr02_43048038 | 2                        | 352.4295              |
| Chr02_43050496 | 2                        | 352.4295              |
| Chr02_43066229 | 2                        | 352.4295              |
| Chr02_43144420 | 2                        | 352.4295              |
| Chr02_43714192 | 2                        | 355.1038              |
| Chr02_42568009 | 2                        | 368.7345              |
| Chr02_42567735 | 2                        | 368.7345              |
| Chr02_41768772 | 2                        | 371.0088              |

| Marker         | Linkage group/Chromosome | Genetic distance (cM) |
|----------------|--------------------------|-----------------------|
| Chr02_41768728 | 2                        | 371.0088              |
| Chr02_41413481 | 2                        | 371.0088              |
| Chr02_40802512 | 2                        | 371.7441              |
| Chr02_39784586 | 2                        | 381.8807              |
| Chr02_39784517 | 2                        | 381.8807              |
| Chr02_39785038 | 2                        | 381.8807              |
| Chr02_40324276 | 2                        | 388.0088              |
| Chr02_40324291 | 2                        | 388.0088              |
| Chr02_40324286 | 2                        | 388.0088              |
| Chr02_10311018 | 2                        | 393.2277              |
| Chr02_10310968 | 2                        | 393.2277              |
| Chr02_15346129 | 2                        | 403.3643              |
| Chr02_15346140 | 2                        | 403.3643              |
| Chr02_15346211 | 2                        | 403.3643              |
| Chr02_15346054 | 2                        | 403.3643              |
| Chr02_15346068 | 2                        | 403.3643              |
| Chr02_15346197 | 2                        | 403.3643              |
| Chr02_15346121 | 2                        | 403.3643              |
| Chr02_15661334 | 2                        | 409.0336              |
| Chr02_29139352 | 2                        | 422.6643              |
| Chr02_27123409 | 2                        | 436.9279              |
| Chr02_33461091 | 2                        | 449.9413              |
| Chr02_33461093 | 2                        | 452.2156              |
| Chr02_49473001 | 2                        | 454.4899              |
| Chr02_38672560 | 2                        | 457.1642              |
| Chr02_38672521 | 2                        | 457.1642              |
| Chr02_37551913 | 2                        | 463.2922              |
| Chr02_37992794 | 2                        | 472.8912              |
| Chr02_37992778 | 2                        | 472.8912              |
| Chr02_37992808 | 2                        | 472.8912              |
| Chr02_37992598 | 2                        | 485.3021              |
| Chr02_37992662 | 2                        | 485.3021              |
| Chr02_30494123 | 2                        | 495.4387              |
| Chr02_30494161 | 2                        | 495.4387              |
| Chr02_34643107 | 2                        | 522.0828              |
| Chr02_18256687 | 2                        | 535.7134              |
| Chr02_26447731 | 2                        | 574.9518              |
| Chr02_37992782 | 2                        | 584.5508              |
| Chr02_37992855 | 2                        | 585.2862              |
| Chr02_45532702 | 2                        | 588.7802              |
| Chr02_18130197 | 2                        | 590.2732              |
| Chr02_2223782  | 2                        | 590.6382              |
| Chr02_48782531 | 2                        | 593.3125              |

| Marker         | Linkage group/Chromosome | Genetic distance (cM) |
|----------------|--------------------------|-----------------------|
| Chr02_16044524 | 2                        | 595.5868              |
| Chr02_765964   | 2                        | 600.9354              |
| Chr02_22458620 | 2                        | 607.5924              |
| Chr02_49157323 | 2                        | 618.2785              |
| Chr02_48823751 | 2                        | 618.6435              |
| Chr02_49004038 | 2                        | 619.7548              |
| Chr02_49166021 | 2                        | 620.4901              |
| Chr02_49223414 | 2                        | 620.8551              |
| Chr02_49223396 | 2                        | 620.8551              |
| Chr02_49223334 | 2                        | 620.8551              |
| Chr02_49223278 | 2                        | 620.8551              |
| Chr02_49223267 | 2                        | 620.8551              |
| Chr02_49223220 | 2                        | 620.8551              |
| Chr02_49223217 | 2                        | 620.8551              |
| Chr02_48823721 | 2                        | 622.3481              |
| Chr02_48823910 | 2                        | 622.3481              |
| Chr02_48823820 | 2                        | 624.6224              |
| Chr02_47556959 | 2                        | 643.8317              |
| Chr02_47556919 | 2                        | 643.8317              |
| Chr02_47065872 | 2                        | 647.3257              |
| Chr02_44759055 | 2                        | 662.9054              |
| Chr02_44715020 | 2                        | 662.9054              |
| Chr02_44526027 | 2                        | 664.0167              |
| Chr02_35846192 | 2                        | 681.7103              |
| Chr02_34070996 | 2                        | 686.4867              |
| Chr02_32101230 | 2                        | 698.3093              |
| Chr02_25847338 | 2                        | 714.5740              |
| Chr02_23651846 | 2                        | 718.4883              |
| Chr02_22783578 | 2                        | 718.8533              |
| Chr02_17974916 | 2                        | 720.7339              |
| Chr02_15954696 | 2                        | 723.4082              |
| Chr02_4071337  | 2                        | 735.2308              |
| Chr02_29261100 | 2                        | 783.5189              |
| Chr02_4665445  | 2                        | 797.7825              |
| Chr02_4665728  | 2                        | 798.8937              |
| Chr02_4659506  | 2                        | 807.9664              |
| Chr03_1228714  | 3                        | 0.0000                |
| Chr03_22681883 | 3                        | 38.1514               |
| Chr03_22730489 | 3                        | 41.6455               |
| Chr03_22730470 | 3                        | 41.6455               |
| Chr03_22730465 | 3                        | 41.6455               |
| Chr03_22730461 | 3                        | 41.6455               |
| Chr03_22730458 | 3                        | 41.6455               |

| Marker         | Linkage group/Chromosome | Genetic distance (cM) |
|----------------|--------------------------|-----------------------|
| Chr03_22730430 | 3                        | 41.6455               |
| Chr03_22730427 | 3                        | 41.6455               |
| Chr03_22730424 | 3                        | 41.6455               |
| Chr03_22730399 | 3                        | 41.6455               |
| Chr03_22730386 | 3                        | 41.6455               |
| Chr03_22730316 | 3                        | 41.6455               |
| Chr03_22730311 | 3                        | 41.6455               |
| Chr03_22502302 | 3                        | 50.7181               |
| Chr03_22502256 | 3                        | 50.7181               |
| Chr03_23063296 | 3                        | 54.2121               |
| Chr03_23653956 | 3                        | 59.8815               |
| Chr03_31865054 | 3                        | 75.4612               |
| Chr03_10968105 | 3                        | 83.5133               |
| Chr03_38749221 | 3                        | 94.7612               |
| Chr03_52202298 | 3                        | 104.8978              |
| Chr03_20056360 | 3                        | 110.5672              |
| Chr03_20056358 | 3                        | 110.5672              |
| Chr03_20056256 | 3                        | 110.5672              |
| Chr03_20056394 | 3                        | 110.5672              |
| Chr03_46989236 | 3                        | 115.3435              |
| Chr03_23833705 | 3                        | 118.4244              |
| Chr03_23833723 | 3                        | 118.4244              |
| Chr03_19460828 | 3                        | 125.4959              |
| Chr03_16452353 | 3                        | 134.0531              |
| Chr03_140937   | 3                        | 149.6328              |
| Chr03_12211975 | 3                        | 165.2125              |
| Chr03_44999663 | 3                        | 172.2841              |
| Chr03_39939576 | 3                        | 174.5584              |
| Chr03_35468421 | 3                        | 185.2848              |
| Chr03_32329201 | 3                        | 187.9591              |
| Chr03_16780909 | 3                        | 197.5580              |
| Chr03_9177319  | 3                        | 203.2274              |
| Chr03_26094159 | 3                        | 210.2989              |
| Chr03_26093987 | 3                        | 210.2989              |
| Chr03_26691340 | 3                        | 221.5468              |
| Chr03_22020606 | 3                        | 231.1458              |
| Chr03_16427753 | 3                        | 237.2739              |
| Chr03_26331668 | 3                        | 239.9482              |
| Chr03_14969248 | 3                        | 242.6225              |
| Chr03_14887155 | 3                        | 242.6225              |
| Chr03_19701297 | 3                        | 243.3578              |
| Chr03_26331646 | 3                        | 244.0932              |
| Chr03_15194436 | 3                        | 244.4582              |

| Marker         | Linkage group/Chromosome | Genetic distance (cM) |
|----------------|--------------------------|-----------------------|
| Chr03_6291829  | 3                        | 249.6770              |
| Chr03_6348541  | 3                        | 249.6770              |
| Chr03_6112428  | 3                        | 250.0420              |
| Chr03_6112490  | 3                        | 250.0420              |
| Chr03_6112799  | 3                        | 250.0420              |
| Chr03_9633219  | 3                        | 255.2609              |
| Chr03_16616870 | 3                        | 255.9962              |
| Chr03_17264256 | 3                        | 255.9962              |
| Chr03_18839040 | 3                        | 255.9962              |
| Chr03_19265038 | 3                        | 255.9962              |
| Chr03_19460894 | 3                        | 255.9962              |
| Chr03_19797543 | 3                        | 255.9962              |
| Chr03_22303899 | 3                        | 255.9962              |
| Chr03_22368437 | 3                        | 255.9962              |
| Chr03_22503317 | 3                        | 255.9962              |
| Chr03_23122375 | 3                        | 255.9962              |
| Chr03_23132149 | 3                        | 255.9962              |
| Chr03_23132150 | 3                        | 255.9962              |
| Chr03_25705964 | 3                        | 255.9962              |
| Chr03_14741490 | 3                        | 256.3612              |
| Chr03_14665946 | 3                        | 256.3612              |
| Chr03_26033564 | 3                        | 256.7262              |
| Chr03_19043093 | 3                        | 257.0911              |
| Chr03_28447734 | 3                        | 257.4561              |
| Chr03_27904401 | 3                        | 257.8210              |
| Chr03_28230894 | 3                        | 257.8210              |
| Chr03_31913224 | 3                        | 261.3151              |
| Chr03_31865107 | 3                        | 261.3151              |
| Chr03_31585376 | 3                        | 261.3151              |
| Chr03_33147007 | 3                        | 262.4264              |
| Chr03_32985006 | 3                        | 262.7914              |
| Chr03_36780399 | 3                        | 270.8434              |
| Chr03_37246267 | 3                        | 273.1177              |
| Chr03_37181875 | 3                        | 273.4827              |
| Chr03_37393560 | 3                        | 274.9757              |
| Chr03_38917803 | 3                        | 277.6500              |
| Chr03_40495420 | 3                        | 282.8688              |
| Chr03_38337538 | 3                        | 288.5382              |
| Chr03_16452251 | 3                        | 332.2682              |
| Chr03_16452359 | 3                        | 332.2682              |
| Chr03_16452253 | 3                        | 349.2371              |
| Chr03_52637785 | 3                        | 358.8361              |
| Chr03_22730448 | 3                        | 386.3014              |

| Marker         | Linkage group/Chromosome | Genetic distance (cM) |
|----------------|--------------------------|-----------------------|
| Chr03_30221015 | 3                        | 398.7123              |
| Chr03_29561087 | 3                        | 399.0773              |
| Chr03_29278472 | 3                        | 409.2139              |
| Chr03_21716114 | 3                        | 420.4618              |
| Chr03_22246304 | 3                        | 421.5731              |
| Chr03_19940645 | 3                        | 421.5731              |
| Chr03_22503310 | 3                        | 421.5731              |
| Chr03_21473584 | 3                        | 421.5731              |
| Chr03_21554809 | 3                        | 421.5731              |
| Chr03_16113189 | 3                        | 421.5731              |
| Chr03_22389250 | 3                        | 421.5731              |
| Chr03_22368469 | 3                        | 421.5731              |
| Chr03_19940829 | 3                        | 421.5731              |
| Chr03_22368403 | 3                        | 421.5731              |
| Chr03_18890989 | 3                        | 421.5731              |
| Chr03_22742439 | 3                        | 421.5731              |
| Chr03_18891091 | 3                        | 421.5731              |
| Chr03_18890946 | 3                        | 421.5731              |
| Chr03_20648600 | 3                        | 421.5731              |
| Chr03_18890962 | 3                        | 421.5731              |
| Chr03_23231768 | 3                        | 421.5731              |
| Chr03_18891053 | 3                        | 421.5731              |
| Chr03_20470851 | 3                        | 421.5731              |
| Chr03_19302598 | 3                        | 421.5731              |
| Chr03_13998658 | 3                        | 421.5731              |
| Chr03_19662581 | 3                        | 421.5731              |
| Chr03_18591301 | 3                        | 421.5731              |
| Chr03_18699942 | 3                        | 421.5731              |
| Chr03_18591247 | 3                        | 421.5731              |
| Chr03_22704084 | 3                        | 421.5731              |
| Chr03_18891074 | 3                        | 421.5731              |
| Chr03_26958821 | 3                        | 421.5731              |
| Chr03_26964552 | 3                        | 421.5731              |
| Chr03_22704035 | 3                        | 421.5731              |
| Chr03_15160144 | 3                        | 421.5731              |
| Chr03_16005796 | 3                        | 421.5731              |
| Chr03_21310813 | 3                        | 421.5731              |
| Chr03_16427748 | 3                        | 421.5731              |
| Chr03_21473583 | 3                        | 421.5731              |
| Chr03_18891090 | 3                        | 421.5731              |
| Chr03_19940766 | 3                        | 421.5731              |
| Chr03_18061775 | 3                        | 421.9381              |
| Chr03_15160088 | 3                        | 422.3030              |



| Marker         | Linkage group/Chromosome | Genetic distance (cM) |
|----------------|--------------------------|-----------------------|
| Chr03_11944640 | 3                        | 422.6680              |
| Chr03_10964387 | 3                        | 422.6680              |
| Chr03_10940359 | 3                        | 422.6680              |
| Chr03_11445872 | 3                        | 423.0330              |
| Chr03_11041115 | 3                        | 424.5259              |
| Chr03_11944447 | 3                        | 426.0189              |
| Chr03_10940320 | 3                        | 426.3839              |
| Chr03_19043097 | 3                        | 426.7488              |
| Chr03_20556992 | 3                        | 427.1138              |
| Chr03_20519595 | 3                        | 430.1946              |
| Chr03_31993097 | 3                        | 436.3227              |
| Chr03_31910483 | 3                        | 436.3227              |
| Chr03_32678669 | 3                        | 437.0580              |
| Chr03_33986137 | 3                        | 437.7934              |
| Chr03_33931818 | 3                        | 438.1583              |
| Chr03_34038425 | 3                        | 438.5233              |
| Chr03_35170919 | 3                        | 439.2586              |
| Chr03_35826104 | 3                        | 441.9329              |
| Chr03_36534304 | 3                        | 444.2072              |
| Chr03_37018284 | 3                        | 445.7002              |
| Chr03_37034020 | 3                        | 446.4355              |
| Chr03_37110640 | 3                        | 447.9285              |
| Chr03_37181800 | 3                        | 449.0398              |
| Chr03_37601067 | 3                        | 450.5328              |
| Chr03_39332727 | 3                        | 454.4470              |
| Chr03_48877722 | 3                        | 468.7106              |
| Chr04_1289198  | 4                        | 0.0000                |
| Chr04_97698    | 4                        | 16.4668               |
| Chr04_43274    | 4                        | 16.8318               |
| Chr04_53507    | 4                        | 16.8318               |
| Chr04_53645    | 4                        | 16.8318               |
| Chr04_432853   | 4                        | 17.9431               |
| Chr04_432809   | 4                        | 18.6784               |
| Chr04_432507   | 4                        | 18.6784               |
| Chr04_386889   | 4                        | 20.1714               |
| Chr04_249767   | 4                        | 21.2827               |
| Chr04_432619   | 4                        | 22.7757               |
| Chr04_140826   | 4                        | 23.8870               |
| Chr04_539955   | 4                        | 23.8870               |
| Chr04_152478   | 4                        | 23.8870               |
| Chr04_152555   | 4                        | 23.8870               |
| Chr04_152763   | 4                        | 23.8870               |
| Chr04_145672   | 4                        | 24.2519               |

| Marker         | Linkage group/Chromosome | Genetic distance (cM) |
|----------------|--------------------------|-----------------------|
| Chr04_266391   | 4                        | 24.6169               |
| Chr04_157804   | 4                        | 24.9819               |
| Chr04_157838   | 4                        | 24.9819               |
| Chr04_121716   | 4                        | 25.3468               |
| Chr04_1425279  | 4                        | 25.7118               |
| Chr04_1959008  | 4                        | 26.0768               |
| Chr04_1958764  | 4                        | 26.0768               |
| Chr04_1958750  | 4                        | 26.0768               |
| Chr04_1425329  | 4                        | 26.4417               |
| Chr04_2516397  | 4                        | 31.6606               |
| Chr04_2514832  | 4                        | 32.0256               |
| Chr04_2723122  | 4                        | 32.7609               |
| Chr04_2654225  | 4                        | 33.4963               |
| Chr04_2723237  | 4                        | 35.3768               |
| Chr04_2723265  | 4                        | 35.3768               |
| Chr04_2723091  | 4                        | 37.2574               |
| Chr04_2894418  | 4                        | 38.3687               |
| Chr04_47491880 | 4                        | 73.3911               |
| Chr04_47502470 | 4                        | 73.7560               |
| Chr04_47177877 | 4                        | 77.2501               |
| Chr04_47116362 | 4                        | 77.2501               |
| Chr04_47116301 | 4                        | 77.2501               |
| Chr04_46864635 | 4                        | 79.1307               |
| Chr04_46864606 | 4                        | 79.1307               |
| Chr04_46843375 | 4                        | 83.4723               |
| Chr04_46765277 | 4                        | 94.1584               |
| Chr04_47009251 | 4                        | 109.0714              |
| Chr04_45079532 | 4                        | 126.7650              |
| Chr04_44669261 | 4                        | 135.3222              |
| Chr04_44669247 | 4                        | 135.3222              |
| Chr04_44669246 | 4                        | 135.3222              |
| Chr04_44669197 | 4                        | 135.3222              |
| Chr04_44669182 | 4                        | 135.3222              |
| Chr04_43896251 | 4                        | 140.5410              |
| Chr04_43896176 | 4                        | 140.5410              |
| Chr04_43796121 | 4                        | 156.1208              |
| Chr04_43796168 | 4                        | 156.1208              |
| Chr04_43896158 | 4                        | 171.7005              |
| Chr04_42416150 | 4                        | 177.8285              |
| Chr04_41856170 | 4                        | 177.8285              |
| Chr04_10127047 | 4                        | 183.9566              |
| Chr04_8877603  | 4                        | 185.0679              |
| Chr04_8087422  | 4                        | 191.6633              |

| Marker        | Linkage group/Chromosome | Genetic distance (cM) |
|---------------|--------------------------|-----------------------|
| Chr04_3454316 | 4                        | 220.2399              |
| Chr04_3454438 | 4                        | 220.6048              |
| Chr04_3454413 | 4                        | 220.6048              |
| Chr04_3453965 | 4                        | 220.6048              |
| Chr04_3442719 | 4                        | 220.6048              |
| Chr04_3442692 | 4                        | 220.6048              |
| Chr04_3509281 | 4                        | 222.4854              |
| Chr04_3509296 | 4                        | 222.4854              |
| Chr04_3442390 | 4                        | 224.3660              |
| Chr04_3203304 | 4                        | 225.4773              |
| Chr04_3182918 | 4                        | 225.4773              |
| Chr04_3182789 | 4                        | 225.4773              |
| Chr04_3182715 | 4                        | 225.4773              |
| Chr04_3026509 | 4                        | 226.2127              |
| Chr04_3026449 | 4                        | 226.2127              |
| Chr04_3026448 | 4                        | 226.2127              |
| Chr04_3026428 | 4                        | 226.2127              |
| Chr04_3026421 | 4                        | 226.2127              |
| Chr04_3026406 | 4                        | 226.2127              |
| Chr04_2941475 | 4                        | 228.8870              |
| Chr04_2925900 | 4                        | 228.8870              |
| Chr04_2925883 | 4                        | 228.8870              |
| Chr04_2925654 | 4                        | 228.8870              |
| Chr04_2925641 | 4                        | 228.8870              |
| Chr04_2925630 | 4                        | 228.8870              |
| Chr04_2925568 | 4                        | 228.8870              |
| Chr04_2826952 | 4                        | 229.6223              |
| Chr04_2885452 | 4                        | 229.9873              |
| Chr04_2723069 | 4                        | 231.0986              |
| Chr04_2738041 | 4                        | 231.4636              |
| Chr04_2738051 | 4                        | 231.4636              |
| Chr04_2654234 | 4                        | 232.1989              |
| Chr04_2577298 | 4                        | 233.6919              |
| Chr04_2577266 | 4                        | 233.6919              |
| Chr04_2577249 | 4                        | 233.6919              |
| Chr04_2577244 | 4                        | 233.6919              |
| Chr04_2577230 | 4                        | 233.6919              |
| Chr04_2515139 | 4                        | 234.8032              |
| Chr04_2577802 | 4                        | 235.1682              |
| Chr04_2578052 | 4                        | 235.5331              |
| Chr04_2514808 | 4                        | 235.8981              |
| Chr04_2514797 | 4                        | 235.8981              |
| Chr04_2514791 | 4                        | 235.8981              |

| Marker         | Linkage group/Chromosome | Genetic distance (cM) |
|----------------|--------------------------|-----------------------|
| Chr04_2514790  | 4                        | 235.8981              |
| Chr04_2514782  | 4                        | 235.8981              |
| Chr04_2514761  | 4                        | 235.8981              |
| Chr04_2578113  | 4                        | 236.2631              |
| Chr04_2577694  | 4                        | 236.2631              |
| Chr04_2577724  | 4                        | 236.2631              |
| Chr04_2577768  | 4                        | 236.2631              |
| Chr04_2577773  | 4                        | 236.2631              |
| Chr04_2578048  | 4                        | 236.2631              |
| Chr04_2418542  | 4                        | 236.6281              |
| Chr04_2418353  | 4                        | 236.6281              |
| Chr04_266330   | 4                        | 243.6996              |
| Chr04_266322   | 4                        | 243.6996              |
| Chr04_1938443  | 4                        | 246.7804              |
| Chr04_1938413  | 4                        | 246.7804              |
| Chr04_1286704  | 4                        | 247.5158              |
| Chr04_540024   | 4                        | 247.8808              |
| Chr04_266240   | 4                        | 248.6161              |
| Chr04_432623   | 4                        | 251.2904              |
| Chr04_387298   | 4                        | 253.9647              |
| Chr04_266481   | 4                        | 253.9647              |
| Chr04_266241   | 4                        | 253.9647              |
| Chr04_386920   | 4                        | 253.9647              |
| Chr04_249374   | 4                        | 254.7001              |
| Chr04_541846   | 4                        | 255.4354              |
| Chr04_541882   | 4                        | 255.4354              |
| Chr04_1958886  | 4                        | 255.8004              |
| Chr04_1593371  | 4                        | 256.1654              |
| Chr04_1910134  | 4                        | 256.5303              |
| Chr04_1286532  | 4                        | 256.8953              |
| Chr04_1286722  | 4                        | 256.8953              |
| Chr04_1360714  | 4                        | 256.8953              |
| Chr04_1425328  | 4                        | 259.5696              |
| Chr04_1425426  | 4                        | 259.5696              |
| Chr04_1425444  | 4                        | 259.5696              |
| Chr04_432533   | 4                        | 263.4838              |
| Chr04_1425262  | 4                        | 266.9778              |
| Chr04_2075287  | 4                        | 277.1145              |
| Chr04_2075250  | 4                        | 277.1145              |
| Chr04_2075247  | 4                        | 277.1145              |
| Chr04_2826985  | 4                        | 319.3217              |
| Chr04_27975920 | 4                        | 323.2360              |
| Chr04_27975803 | 4                        | 323.2360              |

| Marker         | Linkage group/Chromosome | Genetic distance (cM) |
|----------------|--------------------------|-----------------------|
| Chr04_21090729 | 4                        | 327.1502              |
| Chr04_21090727 | 4                        | 327.1502              |
| Chr04_9121923  | 4                        | 339.8736              |
| Chr04_524565   | 4                        | 350.5597              |
| Chr04_524551   | 4                        | 350.5597              |
| Chr04_16744997 | 4                        | 360.6963              |
| Chr04_16744964 | 4                        | 360.6963              |
| Chr04_16744928 | 4                        | 360.6963              |
| Chr04_16744951 | 4                        | 360.6963              |
| Chr04_16745014 | 4                        | 360.6963              |
| Chr04_16744911 | 4                        | 360.6963              |
| Chr04_40526473 | 4                        | 367.7679              |
| Chr04_4660822  | 4                        | 372.1095              |
| Chr04_4660817  | 4                        | 372.1095              |
| Chr04_4660818  | 4                        | 372.1095              |
| Chr04_18204274 | 4                        | 376.0237              |
| Chr04_18204249 | 4                        | 376.0237              |
| Chr04_18204242 | 4                        | 376.0237              |
| Chr04_18204199 | 4                        | 376.0237              |
| Chr04_46279266 | 4                        | 378.6980              |
| Chr04_41212171 | 4                        | 390.6975              |
| Chr04_41212163 | 4                        | 390.6975              |
| Chr04_27975791 | 4                        | 394.1915              |
| Chr04_12030347 | 4                        | 397.2723              |
| Chr04_2515180  | 4                        | 416.8042              |
| Chr04_2515214  | 4                        | 416.8042              |
| Chr04_2515179  | 4                        | 416.8042              |
| Chr04_2514681  | 4                        | 423.3996              |
| Chr04_33521832 | 4                        | 435.2222              |
| Chr04_41211358 | 4                        | 456.0450              |
| Chr04_42684423 | 4                        | 464.6021              |
| Chr04_42416107 | 4                        | 468.0962              |
| Chr04_10843094 | 4                        | 486.5361              |
| Chr04_42674844 | 4                        | 492.2055              |
| Chr04_42674834 | 4                        | 492.2055              |
| Chr04_43641907 | 4                        | 497.8748              |
| Chr04_44087448 | 4                        | 498.6102              |
| Chr04_44155732 | 4                        | 498.9751              |
| Chr04_44075861 | 4                        | 499.7105              |
| Chr04_44096431 | 4                        | 500.4458              |
| Chr04_44076417 | 4                        | 500.4458              |
| Chr04_44076401 | 4                        | 500.4458              |
| Chr04_44076329 | 4                        | 500.4458              |

| Marker         | Linkage group/Chromosome | Genetic distance (cM) |
|----------------|--------------------------|-----------------------|
| Chr04_44054178 | 4                        | 500.8108              |
| Chr04_46001791 | 4                        | 519.2507              |
| Chr04_46009668 | 4                        | 519.9861              |
| Chr04_47515458 | 4                        | 538.4260              |
| Chr04_47515570 | 4                        | 538.7910              |
| Chr04_2885340  | 4                        | 578.6672              |
| Chr04_2075580  | 4                        | 583.4436              |
| Chr04_448848   | 4                        | 586.9376              |
| Chr04_45772739 | 4                        | 596.5366              |
| Chr04_47010603 | 4                        | 614.2303              |
| Chr04_47010672 | 4                        | 640.6316              |
| Chr04_47010688 | 4                        | 640.6316              |
| Chr04_45275966 | 4                        | 656.8963              |
| Chr04_24369010 | 4                        | 686.6359              |
| Chr05_623529   | 5                        | 0.0000                |
| Chr05_623370   | 5                        | 0.0000                |
| Chr05_1647342  | 5                        | 12.4109               |
| Chr05_1647320  | 5                        | 12.4109               |
| Chr05_1647355  | 5                        | 12.4109               |
| Chr05_1728256  | 5                        | 37.7917               |
| Chr05_39106645 | 5                        | 49.0396               |
| Chr05_10133781 | 5                        | 52.5337               |
| Chr05_37969231 | 5                        | 59.1290               |
| Chr05_37969246 | 5                        | 59.1290               |
| Chr05_34997198 | 5                        | 65.7244               |
| Chr05_26069059 | 5                        | 74.7970               |
| Chr05_34831535 | 5                        | 80.4664               |
| Chr05_2291503  | 5                        | 83.5472               |
| Chr05_10569404 | 5                        | 85.0402               |
| Chr05_23311666 | 5                        | 87.3145               |
| Chr05_39732566 | 5                        | 91.2287               |
| Chr05_36031122 | 5                        | 93.9030               |
| Chr05_27262278 | 5                        | 100.0310              |
| Chr05_27262422 | 5                        | 100.0310              |
| Chr05_24573008 | 5                        | 103.1119              |
| Chr05_36614387 | 5                        | 108.3307              |
| Chr05_37437086 | 5                        | 109.4420              |
| Chr05_18974461 | 5                        | 111.7163              |
| Chr05_12510195 | 5                        | 112.8276              |
| Chr05_38799077 | 5                        | 114.7082              |
| Chr05_38546075 | 5                        | 115.0732              |
| Chr05_38546072 | 5                        | 115.0732              |
| Chr05_38798992 | 5                        | 115.4381              |

| Marker         | Linkage group/Chromosome | Genetic distance (cM) |
|----------------|--------------------------|-----------------------|
| Chr05_8146477  | 5                        | 117.7124              |
| Chr05_19520638 | 5                        | 125.7645              |
| Chr05_19520640 | 5                        | 125.7645              |
| Chr05_19520641 | 5                        | 125.7645              |
| Chr05_19520649 | 5                        | 125.7645              |
| Chr05_19520495 | 5                        | 126.1295              |
| Chr05_19520556 | 5                        | 126.1295              |
| Chr05_45532    | 5                        | 136.8156              |
| Chr05_45488    | 5                        | 137.1806              |
| Chr05_11445111 | 5                        | 152.7603              |
| Chr05_11445101 | 5                        | 169.0250              |
| Chr05_26026223 | 5                        | 189.0279              |
| Chr05_26026134 | 5                        | 189.0279              |
| Chr05_22629830 | 5                        | 194.2468              |
| Chr05_31681432 | 5                        | 214.2498              |
| Chr05_17545977 | 5                        | 227.2632              |
| Chr05_17035784 | 5                        | 229.5374              |
| Chr05_27487392 | 5                        | 229.9024              |
| Chr05_11498360 | 5                        | 231.3954              |
| Chr05_26426875 | 5                        | 232.8884              |
| Chr05_23311649 | 5                        | 233.9997              |
| Chr05_22794178 | 5                        | 234.3647              |
| Chr05_24338462 | 5                        | 235.4760              |
| Chr05_25938962 | 5                        | 235.4760              |
| Chr05_24267189 | 5                        | 235.8409              |
| Chr05_34991338 | 5                        | 239.3350              |
| Chr05_34818123 | 5                        | 239.7000              |
| Chr05_34831428 | 5                        | 240.0649              |
| Chr05_35555935 | 5                        | 241.9455              |
| Chr05_36323410 | 5                        | 243.8261              |
| Chr05_36312030 | 5                        | 243.8261              |
| Chr05_36312188 | 5                        | 244.1911              |
| Chr05_36312213 | 5                        | 244.1911              |
| Chr05_36312224 | 5                        | 244.1911              |
| Chr05_36323442 | 5                        | 244.5560              |
| Chr05_36630855 | 5                        | 246.8303              |
| Chr05_36645864 | 5                        | 247.1953              |
| Chr05_36564975 | 5                        | 247.5603              |
| Chr05_36502025 | 5                        | 247.9253              |
| Chr05_36501959 | 5                        | 247.9253              |
| Chr05_36630880 | 5                        | 248.2902              |
| Chr05_36632022 | 5                        | 248.2902              |
| Chr05_36649291 | 5                        | 248.2902              |

| Marker         | Linkage group/Chromosome | Genetic distance (cM) |
|----------------|--------------------------|-----------------------|
| Chr05_36565001 | 5                        | 248.2902              |
| Chr05_36566255 | 5                        | 248.2902              |
| Chr05_36630891 | 5                        | 248.2902              |
| Chr05_36631715 | 5                        | 248.2902              |
| Chr05_36631825 | 5                        | 248.2902              |
| Chr05_36631982 | 5                        | 248.2902              |
| Chr05_36879045 | 5                        | 249.0256              |
| Chr05_36946384 | 5                        | 249.3906              |
| Chr05_36946393 | 5                        | 249.3906              |
| Chr05_37131287 | 5                        | 249.7555              |
| Chr05_37131317 | 5                        | 249.7555              |
| Chr05_37131175 | 5                        | 249.7555              |
| Chr05_37131219 | 5                        | 249.7555              |
| Chr05_37131220 | 5                        | 249.7555              |
| Chr05_37131265 | 5                        | 249.7555              |
| Chr05_37360531 | 5                        | 250.1205              |
| Chr05_37345519 | 5                        | 250.1205              |
| Chr05_37360656 | 5                        | 250.4855              |
| Chr05_37361216 | 5                        | 250.8505              |
| Chr05_37245561 | 5                        | 251.2154              |
| Chr05_37245537 | 5                        | 251.2154              |
| Chr05_37245510 | 5                        | 251.2154              |
| Chr05_37467219 | 5                        | 251.5804              |
| Chr05_37497787 | 5                        | 251.9454              |
| Chr05_37498074 | 5                        | 251.9454              |
| Chr05_37412467 | 5                        | 251.9454              |
| Chr05_37414433 | 5                        | 251.9454              |
| Chr05_37466992 | 5                        | 251.9454              |
| Chr05_37544430 | 5                        | 252.3104              |
| Chr05_37644856 | 5                        | 252.3104              |
| Chr05_37739234 | 5                        | 252.6753              |
| Chr05_37846930 | 5                        | 253.0403              |
| Chr05_37885227 | 5                        | 254.1406              |
| Chr05_37847070 | 5                        | 254.1406              |
| Chr05_38269773 | 5                        | 269.9926              |
| Chr05_39634064 | 5                        | 279.0652              |
| Chr05_39634065 | 5                        | 279.0652              |
| Chr05_39470354 | 5                        | 286.6222              |
| Chr05_39470158 | 5                        | 289.7030              |
| Chr05_39732367 | 5                        | 290.0680              |
| Chr05_39732319 | 5                        | 290.0680              |
| Chr05_39732082 | 5                        | 290.0680              |
| Chr05_39720833 | 5                        | 290.0680              |



| Marker         | Linkage group/Chromosome | Genetic distance (cM) |
|----------------|--------------------------|-----------------------|
| Chr05_39720832 | 5                        | 290.0680              |
| Chr05_39720791 | 5                        | 290.0680              |
| Chr05_39720776 | 5                        | 290.0680              |
| Chr05_39720775 | 5                        | 290.0680              |
| Chr05_39470170 | 5                        | 290.4329              |
| Chr05_39711210 | 5                        | 290.7979              |
| Chr05_39470196 | 5                        | 291.1628              |
| Chr05_39470271 | 5                        | 291.5278              |
| Chr05_39470200 | 5                        | 291.8928              |
| Chr05_39470206 | 5                        | 291.8928              |
| Chr05_39470223 | 5                        | 291.8928              |
| Chr05_39711014 | 5                        | 291.8928              |
| Chr05_39711038 | 5                        | 291.8928              |
| Chr05_39744481 | 5                        | 291.8928              |
| Chr05_39470198 | 5                        | 292.6281              |
| Chr05_39482004 | 5                        | 293.3635              |
| Chr05_39479013 | 5                        | 293.7284              |
| Chr05_39479030 | 5                        | 293.7284              |
| Chr05_39479033 | 5                        | 293.7284              |
| Chr05_39479042 | 5                        | 293.7284              |
| Chr05_39479078 | 5                        | 293.7284              |
| Chr05_39479093 | 5                        | 293.7284              |
| Chr05_39508871 | 5                        | 293.7284              |
| Chr05_39508874 | 5                        | 293.7284              |
| Chr05_39508880 | 5                        | 293.7284              |
| Chr05_39470178 | 5                        | 294.0934              |
| Chr05_39421646 | 5                        | 294.4583              |
| Chr05_39421656 | 5                        | 294.4583              |
| Chr05_39325966 | 5                        | 294.8233              |
| Chr05_39339847 | 5                        | 294.8233              |
| Chr05_39339886 | 5                        | 294.8233              |
| Chr05_39339907 | 5                        | 294.8233              |
| Chr05_39339913 | 5                        | 294.8233              |
| Chr05_39339919 | 5                        | 294.8233              |
| Chr05_39339948 | 5                        | 294.8233              |
| Chr05_39339966 | 5                        | 294.8233              |
| Chr05_39339968 | 5                        | 294.8233              |
| Chr05_39340027 | 5                        | 294.8233              |
| Chr05_39340048 | 5                        | 294.8233              |
| Chr05_39385959 | 5                        | 294.8233              |
| Chr05_39408010 | 5                        | 294.8233              |
| Chr05_39209228 | 5                        | 295.1883              |
| Chr05_39209459 | 5                        | 295.1883              |

| Marker         | Linkage group/Chromosome | Genetic distance (cM) |
|----------------|--------------------------|-----------------------|
| Chr05_39209472 | 5                        | 295.1883              |
| Chr05_39270318 | 5                        | 295.1883              |
| Chr05_39270392 | 5                        | 295.1883              |
| Chr05_39270456 | 5                        | 295.1883              |
| Chr05_39270556 | 5                        | 295.1883              |
| Chr05_38979323 | 5                        | 295.5532              |
| Chr05_39003340 | 5                        | 295.5532              |
| Chr05_39003394 | 5                        | 295.5532              |
| Chr05_39003412 | 5                        | 295.5532              |
| Chr05_39003413 | 5                        | 295.5532              |
| Chr05_39003432 | 5                        | 295.5532              |
| Chr05_39003565 | 5                        | 295.5532              |
| Chr05_39003588 | 5                        | 295.5532              |
| Chr05_39003704 | 5                        | 295.5532              |
| Chr05_39003726 | 5                        | 295.5532              |
| Chr05_39003748 | 5                        | 295.5532              |
| Chr05_39003768 | 5                        | 295.5532              |
| Chr05_39003785 | 5                        | 295.5532              |
| Chr05_39003791 | 5                        | 295.5532              |
| Chr05_39003792 | 5                        | 295.5532              |
| Chr05_38892618 | 5                        | 296.6645              |
| Chr05_38892633 | 5                        | 296.6645              |
| Chr05_38892640 | 5                        | 296.6645              |
| Chr05_38892645 | 5                        | 296.6645              |
| Chr05_38892718 | 5                        | 296.6645              |
| Chr05_38892927 | 5                        | 296.6645              |
| Chr05_38892969 | 5                        | 296.6645              |
| Chr05_38893032 | 5                        | 296.6645              |
| Chr05_38715720 | 5                        | 297.7758              |
| Chr05_38733624 | 5                        | 297.7758              |
| Chr05_38733670 | 5                        | 297.7758              |
| Chr05_38733706 | 5                        | 297.7758              |
| Chr05_38733721 | 5                        | 297.7758              |
| Chr05_38759007 | 5                        | 297.7758              |
| Chr05_38798914 | 5                        | 297.7758              |
| Chr05_38418724 | 5                        | 299.2688              |
| Chr05_38536809 | 5                        | 299.6338              |
| Chr05_38484366 | 5                        | 299.6338              |
| Chr05_38484326 | 5                        | 299.6338              |
| Chr05_38484218 | 5                        | 299.6338              |
| Chr05_38484210 | 5                        | 299.6338              |
| Chr05_38418759 | 5                        | 299.9987              |
| Chr05_38418794 | 5                        | 299.9987              |

| Marker         | Linkage group/Chromosome | Genetic distance (cM) |
|----------------|--------------------------|-----------------------|
| Chr05_38418815 | 5                        | 299.9987              |
| Chr05_38418820 | 5                        | 299.9987              |
| Chr05_38418864 | 5                        | 299.9987              |
| Chr05_38418868 | 5                        | 299.9987              |
| Chr05_38418879 | 5                        | 299.9987              |
| Chr05_38418887 | 5                        | 299.9987              |
| Chr05_38407790 | 5                        | 300.3637              |
| Chr05_38407821 | 5                        | 300.3637              |
| Chr05_38407884 | 5                        | 300.3637              |
| Chr05_38365632 | 5                        | 300.7286              |
| Chr05_38339651 | 5                        | 301.4640              |
| Chr05_38339638 | 5                        | 301.4640              |
| Chr05_38339544 | 5                        | 301.4640              |
| Chr05_38319535 | 5                        | 302.5753              |
| Chr05_38205280 | 5                        | 303.3106              |
| Chr05_38205219 | 5                        | 303.3106              |
| Chr05_38286634 | 5                        | 304.0460              |
| Chr05_38286482 | 5                        | 304.0460              |
| Chr05_38195550 | 5                        | 304.4109              |
| Chr05_38195379 | 5                        | 304.4109              |
| Chr05_38269776 | 5                        | 304.7759              |
| Chr05_38536162 | 5                        | 318.2666              |
| Chr05_38269801 | 5                        | 327.8656              |
| Chr05_38269879 | 5                        | 327.8656              |
| Chr05_38269802 | 5                        | 327.8656              |
| Chr05_39721734 | 5                        | 345.5593              |
| Chr05_39230007 | 5                        | 356.2454              |
| Chr05_38799035 | 5                        | 369.8760              |
| Chr05_11498463 | 5                        | 395.2568              |
| Chr05_2291502  | 5                        | 413.6968              |
| Chr05_39003513 | 5                        | 420.7683              |
| Chr05_10448374 | 5                        | 429.8410              |
| Chr05_19520549 | 5                        | 442.2519              |
| Chr05_19520559 | 5                        | 442.2519              |
| Chr05_18868614 | 5                        | 452.9380              |
| Chr05_37969266 | 5                        | 460.9901              |
| Chr05_37969323 | 5                        | 460.9901              |
| Chr05_37438997 | 5                        | 488.4554              |
| Chr05_36565704 | 5                        | 517.0320              |
| Chr05_38536287 | 5                        | 530.5082              |
| Chr05_38536272 | 5                        | 530.5082              |
| Chr05_38269805 | 5                        | 540.1072              |
| Chr05_39075672 | 5                        | 544.4489              |

| Marker         | Linkage group/Chromosome | Genetic distance (cM) |
|----------------|--------------------------|-----------------------|
| Chr05_39153144 | 5                        | 544.4489              |
| Chr05_39905682 | 5                        | 552.0059              |
| Chr05_39905533 | 5                        | 552.0059              |
| Chr05_39158693 | 5                        | 560.5630              |
| Chr05_39209452 | 5                        | 563.2373              |
| Chr05_39189655 | 5                        | 563.2373              |
| Chr05_39144053 | 5                        | 563.6023              |
| Chr05_39144049 | 5                        | 563.6023              |
| Chr05_39144016 | 5                        | 563.6023              |
| Chr05_39144011 | 5                        | 563.6023              |
| Chr05_39144007 | 5                        | 563.6023              |
| Chr05_39144044 | 5                        | 563.6023              |
| Chr05_39143993 | 5                        | 563.6023              |
| Chr05_39209490 | 5                        | 563.9673              |
| Chr05_39209358 | 5                        | 563.9673              |
| Chr05_39153545 | 5                        | 563.9673              |
| Chr05_39153145 | 5                        | 563.9673              |
| Chr05_39209479 | 5                        | 563.9673              |
| Chr05_39158003 | 5                        | 564.3323              |
| Chr05_39158459 | 5                        | 564.3323              |
| Chr05_39091087 | 5                        | 564.3323              |
| Chr05_39158315 | 5                        | 564.3323              |
| Chr05_39091177 | 5                        | 564.3323              |
| Chr05_39158476 | 5                        | 564.3323              |
| Chr05_39091159 | 5                        | 564.3323              |
| Chr05_39091210 | 5                        | 564.3323              |
| Chr05_39091124 | 5                        | 564.3323              |
| Chr05_39091111 | 5                        | 564.3323              |
| Chr05_39091240 | 5                        | 564.3323              |
| Chr05_39091271 | 5                        | 564.3323              |
| Chr05_39091264 | 5                        | 564.3323              |
| Chr05_39023722 | 5                        | 564.6973              |
| Chr05_39023766 | 5                        | 564.6973              |
| Chr05_39023770 | 5                        | 564.6973              |
| Chr05_39023510 | 5                        | 564.6973              |
| Chr05_39003784 | 5                        | 564.6973              |
| Chr05_39023799 | 5                        | 564.6973              |
| Chr05_39023821 | 5                        | 564.6973              |
| Chr05_39023819 | 5                        | 564.6973              |
| Chr05_39023792 | 5                        | 564.6973              |
| Chr05_39023789 | 5                        | 564.6973              |
| Chr05_39023816 | 5                        | 564.6973              |
| Chr05_38979212 | 5                        | 565.0623              |

| Marker         | Linkage group/Chromosome | Genetic distance (cM) |
|----------------|--------------------------|-----------------------|
| Chr05_39003561 | 5                        | 566.9429              |
| Chr05_39003336 | 5                        | 566.9429              |
| Chr05_38979060 | 5                        | 568.8235              |
| Chr05_38364974 | 5                        | 573.5999              |
| Chr05_38286555 | 5                        | 573.9648              |
| Chr05_38286536 | 5                        | 573.9648              |
| Chr05_36594542 | 5                        | 583.7961              |
| Chr05_36676250 | 5                        | 584.1611              |
| Chr05_36416745 | 5                        | 586.0417              |
| Chr05_34991312 | 5                        | 592.1698              |
| Chr05_34991184 | 5                        | 592.1698              |
| Chr05_32450826 | 5                        | 594.8441              |
| Chr05_31202635 | 5                        | 595.2091              |
| Chr05_31015902 | 5                        | 595.2091              |
| Chr05_30039829 | 5                        | 595.9445              |
| Chr05_29504772 | 5                        | 596.6798              |
| Chr05_29504773 | 5                        | 596.6798              |
| Chr05_19238819 | 5                        | 597.7911              |
| Chr05_24402293 | 5                        | 598.5264              |
| Chr05_25264502 | 5                        | 599.2618              |
| Chr05_15714615 | 5                        | 599.9971              |
| Chr05_666529   | 5                        | 620.8199              |
| Chr05_666604   | 5                        | 620.8199              |
| Chr05_666589   | 5                        | 620.8199              |
| Chr05_666526   | 5                        | 620.8199              |
| Chr05_666726   | 5                        | 620.8199              |
| Chr05_666553   | 5                        | 620.8199              |
| Chr05_673021   | 5                        | 621.1849              |
| Chr05_672790   | 5                        | 621.1849              |
| Chr05_672843   | 5                        | 621.1849              |
| Chr05_672793   | 5                        | 621.1849              |
| Chr06_11147038 | 6                        | 0.0000                |
| Chr06_13598327 | 6                        | 36.5379               |
| Chr06_13598278 | 6                        | 36.9029               |
| Chr06_12357419 | 6                        | 39.1772               |
| Chr06_11884351 | 6                        | 39.5422               |
| Chr06_11247217 | 6                        | 40.2775               |
| Chr06_11457751 | 6                        | 40.2775               |
| Chr06_10311743 | 6                        | 40.6425               |
| Chr06_10311723 | 6                        | 40.6425               |
| Chr06_10311673 | 6                        | 40.6425               |
| Chr06_10311668 | 6                        | 40.6425               |
| Chr06_10311666 | 6                        | 40.6425               |

| Marker         | Linkage group/Chromosome | Genetic distance (cM) |
|----------------|--------------------------|-----------------------|
| Chr06_10311626 | 6                        | 40.6425               |
| Chr06_10311602 | 6                        | 40.6425               |
| Chr06_9993489  | 6                        | 41.0075               |
| Chr06_9598516  | 6                        | 41.3724               |
| Chr06_4996657  | 6                        | 42.4837               |
| Chr06_4996666  | 6                        | 42.4837               |
| Chr06_4996683  | 6                        | 42.4837               |
| Chr06_5132075  | 6                        | 42.4837               |
| Chr06_5132108  | 6                        | 42.4837               |
| Chr06_3881331  | 6                        | 42.8487               |
| Chr06_2241050  | 6                        | 43.2137               |
| Chr06_2241090  | 6                        | 43.2137               |
| Chr06_7444578  | 6                        | 43.5786               |
| Chr06_7444843  | 6                        | 43.5786               |
| Chr06_804980   | 6                        | 43.5786               |
| Chr06_7523831  | 6                        | 43.5786               |
| Chr06_2068194  | 6                        | 43.5786               |
| Chr06_7523874  | 6                        | 43.5786               |
| Chr06_7639390  | 6                        | 43.5786               |
| Chr06_6960269  | 6                        | 51.6850               |
| Chr06_6960260  | 6                        | 51.6850               |
| Chr06_6960153  | 6                        | 51.6850               |
| Chr06_6960259  | 6                        | 51.6850               |
| Chr06_7027348  | 6                        | 52.7963               |
| Chr06_804874   | 6                        | 52.7963               |
| Chr06_4511150  | 6                        | 53.1612               |
| Chr06_2372529  | 6                        | 53.8966               |
| Chr06_7926694  | 6                        | 54.6319               |
| Chr06_8144805  | 6                        | 54.6319               |
| Chr06_202121   | 6                        | 54.6319               |
| Chr06_1504675  | 6                        | 54.9969               |
| Chr06_1570822  | 6                        | 56.4899               |
| Chr06_2179083  | 6                        | 57.6012               |
| Chr06_2179042  | 6                        | 57.6012               |
| Chr06_5117515  | 6                        | 59.8755               |
| Chr06_11125594 | 6                        | 72.2864               |
| Chr06_11147008 | 6                        | 75.7804               |
| Chr06_11147018 | 6                        | 77.2734               |
| Chr06_11147037 | 6                        | 77.2734               |
| Chr06_11147062 | 6                        | 77.2734               |
| Chr06_11147125 | 6                        | 77.2734               |
| Chr06_11147130 | 6                        | 77.2734               |
| Chr06_11147131 | 6                        | 77.2734               |

| Marker         | Linkage group/Chromosome | Genetic distance (cM) |
|----------------|--------------------------|-----------------------|
| Chr06_11147148 | 6                        | 77.2734               |
| Chr06_11147170 | 6                        | 77.2734               |
| Chr06_11147194 | 6                        | 77.2734               |
| Chr06_11953496 | 6                        | 79.9477               |
| Chr06_12685271 | 6                        | 89.5467               |
| Chr06_13708076 | 6                        | 98.6193               |
| Chr06_13708075 | 6                        | 100.1123              |
| Chr06_13708079 | 6                        | 100.1123              |
| Chr06_3620145  | 6                        | 107.1839              |
| Chr06_11125610 | 6                        | 120.1973              |
| Chr06_11125508 | 6                        | 127.2688              |
| Chr06_11125556 | 6                        | 127.2688              |
| Chr06_11125592 | 6                        | 127.2688              |
| Chr06_11125601 | 6                        | 127.2688              |
| Chr06_11144175 | 6                        | 131.1830              |
| Chr06_9499282  | 6                        | 132.2943              |
| Chr06_7512117  | 6                        | 134.9686              |
| Chr06_3620262  | 6                        | 144.5676              |
| Chr06_3620267  | 6                        | 144.5676              |
| Chr06_23267080 | 6                        | 155.2537              |
| Chr06_13708077 | 6                        | 162.3253              |
| Chr06_5930402  | 6                        | 168.4533              |
| Chr06_8027852  | 6                        | 171.5341              |
| Chr06_12244172 | 6                        | 173.8084              |
| Chr06_16983085 | 6                        | 176.8893              |
| Chr06_2807093  | 6                        | 237.7187              |
| Chr06_4981124  | 6                        | 275.8701              |
| Chr06_4981178  | 6                        | 276.2350              |
| Chr06_4981184  | 6                        | 276.2350              |
| Chr06_4981132  | 6                        | 276.2350              |
| Chr06_4981255  | 6                        | 276.2350              |
| Chr06_4981144  | 6                        | 276.2350              |
| Chr06_4981192  | 6                        | 276.2350              |
| Chr06_4981282  | 6                        | 276.2350              |
| Chr06_10145393 | 6                        | 302.6364              |
| Chr06_9449875  | 6                        | 304.1293              |
| Chr06_804951   | 6                        | 305.6223              |
| Chr06_5686151  | 6                        | 305.6223              |
| Chr06_3667779  | 6                        | 305.9873              |
| Chr06_495353   | 6                        | 306.3522              |
| Chr06_16733    | 6                        | 306.7172              |
| Chr06_1374720  | 6                        | 307.8285              |
| Chr06_14123970 | 6                        | 311.7427              |

| Marker         | Linkage group/Chromosome | Genetic distance (cM) |
|----------------|--------------------------|-----------------------|
| Chr06_14124318 | 6                        | 312.1077              |
| Chr06_16976975 | 6                        | 314.3820              |
| Chr07_94040    | 7                        | 0.0000                |
| Chr07_41455    | 7                        | 0.3650                |
| Chr07_3320417  | 7                        | 54.2316               |
| Chr07_3845608  | 7                        | 58.5732               |
| Chr07_3842984  | 7                        | 58.5732               |
| Chr07_3994326  | 7                        | 58.5732               |
| Chr07_4000907  | 7                        | 58.5732               |
| Chr07_3998919  | 7                        | 68.1722               |
| Chr07_3999150  | 7                        | 68.1722               |
| Chr07_2304021  | 7                        | 108.0484              |
| Chr07_694745   | 7                        | 118.1850              |
| Chr07_3845350  | 7                        | 120.8593              |
| Chr07_3845448  | 7                        | 120.8593              |
| Chr07_25472421 | 7                        | 130.4583              |
| Chr07_6299590  | 7                        | 172.1872              |
| Chr07_4000847  | 7                        | 179.7442              |
| Chr07_4000845  | 7                        | 179.7442              |
| Chr07_4000861  | 7                        | 179.7442              |
| Chr07_4000848  | 7                        | 179.7442              |
| Chr07_4013666  | 7                        | 180.1092              |
| Chr07_4013578  | 7                        | 180.4742              |
| Chr07_4000863  | 7                        | 181.2095              |
| Chr07_4000940  | 7                        | 181.2095              |
| Chr07_4001326  | 7                        | 181.9449              |
| Chr07_4001302  | 7                        | 181.9449              |
| Chr07_4001229  | 7                        | 181.9449              |
| Chr07_4000869  | 7                        | 182.6803              |
| Chr07_4294915  | 7                        | 192.8169              |
| Chr07_4294817  | 7                        | 192.8169              |
| Chr07_4294605  | 7                        | 193.9282              |
| Chr07_4294483  | 7                        | 193.9282              |
| Chr07_4294579  | 7                        | 193.9282              |
| Chr07_4048097  | 7                        | 223.6678              |
| Chr07_35573668 | 7                        | 225.9421              |
| Chr07_2081481  | 7                        | 227.4351              |
| Chr07_7961650  | 7                        | 230.1094              |
| Chr07_17764063 | 7                        | 241.9320              |
| Chr07_25298541 | 7                        | 253.1799              |
| Chr07_25298447 | 7                        | 253.1799              |
| Chr07_25298428 | 7                        | 253.1799              |
| Chr07_25298427 | 7                        | 253.1799              |



| Marker         | Linkage group/Chromosome | Genetic distance (cM) |
|----------------|--------------------------|-----------------------|
| Chr07_25298569 | 7                        | 256.6740              |
| Chr07_15650117 | 7                        | 269.0849              |
| Chr07_3554390  | 7                        | 278.1575              |
| Chr07_27944114 | 7                        | 282.9339              |
| Chr07_39534510 | 7                        | 292.0065              |
| Chr07_39534529 | 7                        | 292.0065              |
| Chr07_39064534 | 7                        | 318.4078              |
| Chr07_39064520 | 7                        | 318.4078              |
| Chr07_39064496 | 7                        | 318.4078              |
| Chr07_39064470 | 7                        | 318.4078              |
| Chr07_39089143 | 7                        | 325.0032              |
| Chr07_39089142 | 7                        | 325.0032              |
| Chr07_39089134 | 7                        | 325.0032              |
| Chr07_39089132 | 7                        | 325.0032              |
| Chr07_39089106 | 7                        | 325.0032              |
| Chr07_39089103 | 7                        | 325.0032              |
| Chr07_39291009 | 7                        | 326.8838              |
| Chr07_39291024 | 7                        | 326.8838              |
| Chr07_39291044 | 7                        | 326.8838              |
| Chr07_39291064 | 7                        | 326.8838              |
| Chr07_39291073 | 7                        | 326.8838              |
| Chr07_39291095 | 7                        | 326.8838              |
| Chr07_39291120 | 7                        | 326.8838              |
| Chr07_39355768 | 7                        | 327.2487              |
| Chr07_39504534 | 7                        | 327.6137              |
| Chr07_39504584 | 7                        | 327.6137              |
| Chr07_39504669 | 7                        | 327.6137              |
| Chr07_39508777 | 7                        | 327.6137              |
| Chr07_39356252 | 7                        | 327.9787              |
| Chr07_39355881 | 7                        | 328.3436              |
| Chr07_39265232 | 7                        | 329.4549              |
| Chr07_39265642 | 7                        | 329.4549              |
| Chr07_39199104 | 7                        | 330.1903              |
| Chr07_39199113 | 7                        | 330.1903              |
| Chr07_39199126 | 7                        | 330.1903              |
| Chr07_39199162 | 7                        | 330.1903              |
| Chr07_39199170 | 7                        | 330.1903              |
| Chr07_39199416 | 7                        | 330.1903              |
| Chr07_39199499 | 7                        | 330.1903              |
| Chr07_39199510 | 7                        | 330.1903              |
| Chr07_39199514 | 7                        | 330.1903              |
| Chr07_37600627 | 7                        | 345.7700              |
| Chr07_36653260 | 7                        | 356.4561              |

| Marker         | Linkage group/Chromosome | Genetic distance (cM) |
|----------------|--------------------------|-----------------------|
| Chr07_36653346 | 7                        | 356.4561              |
| Chr07_36606955 | 7                        | 356.8210              |
| Chr07_36606993 | 7                        | 356.8210              |
| Chr07_36641078 | 7                        | 356.8210              |
| Chr07_36641094 | 7                        | 356.8210              |
| Chr07_36641105 | 7                        | 356.8210              |
| Chr07_36641226 | 7                        | 356.8210              |
| Chr07_36642579 | 7                        | 356.8210              |
| Chr07_36642609 | 7                        | 356.8210              |
| Chr07_1516790  | 7                        | 414.0260              |
| Chr07_39164101 | 7                        | 502.5499              |
| Chr08_17449396 | 8                        | 0.0000                |
| Chr08_17449509 | 8                        | 2.2743                |
| Chr08_26372132 | 8                        | 26.6745               |
| Chr08_23994426 | 8                        | 39.6879               |
| Chr08_62851044 | 8                        | 59.6909               |
| Chr08_33179134 | 8                        | 71.5135               |
| Chr08_33179144 | 8                        | 71.5135               |
| Chr08_33179159 | 8                        | 71.5135               |
| Chr08_33179166 | 8                        | 71.5135               |
| Chr08_33179205 | 8                        | 71.5135               |
| Chr08_33179207 | 8                        | 71.5135               |
| Chr08_12339438 | 8                        | 77.1829               |
| Chr08_12488365 | 8                        | 85.7400               |
| Chr08_12488287 | 8                        | 85.7400               |
| Chr08_12488250 | 8                        | 85.7400               |
| Chr08_12488247 | 8                        | 85.7400               |
| Chr08_12488416 | 8                        | 86.1050               |
| Chr08_12488285 | 8                        | 86.4700               |
| Chr08_33393436 | 8                        | 95.5426               |
| Chr08_33393288 | 8                        | 95.5426               |
| Chr08_33079494 | 8                        | 102.6142              |
| Chr08_41965257 | 8                        | 173.8095              |
| Chr08_41965366 | 8                        | 197.2662              |
| Chr08_41965288 | 8                        | 197.2662              |
| Chr08_41965307 | 8                        | 197.2662              |
| Chr08_41965308 | 8                        | 197.2662              |
| Chr08_41965323 | 8                        | 197.2662              |
| Chr08_48440041 | 8                        | 211.5298              |
| Chr08_17449473 | 8                        | 243.7715              |
| Chr08_15726857 | 8                        | 271.2368              |
| Chr08_15726875 | 8                        | 271.2368              |
| Chr08_6374126  | 8                        | 292.0596              |

| Marker         | Linkage group/Chromosome | Genetic distance (cM) |
|----------------|--------------------------|-----------------------|
| Chr08_6374057  | 8                        | 292.0596              |
| Chr08_6374124  | 8                        | 292.0596              |
| Chr08_6374128  | 8                        | 292.0596              |
| Chr08_6374020  | 8                        | 292.0596              |
| Chr08_6374129  | 8                        | 292.0596              |
| Chr08_41016116 | 8                        | 309.7532              |
| Chr08_33393417 | 8                        | 324.6662              |
| Chr08_15233298 | 8                        | 334.2652              |
| Chr08_15233224 | 8                        | 334.2652              |
| Chr08_10926144 | 8                        | 344.4018              |
| Chr08_10926165 | 8                        | 344.4018              |
| Chr08_10926186 | 8                        | 344.4018              |
| Chr08_31868383 | 8                        | 357.5643              |
| Chr08_31868357 | 8                        | 357.5643              |
| Chr08_39181410 | 8                        | 360.2386              |
| Chr08_23994451 | 8                        | 385.1049              |
| Chr08_23994410 | 8                        | 385.1049              |
| Chr08_23994267 | 8                        | 385.1049              |
| Chr08_24659982 | 8                        | 387.7791              |
| Chr08_26763182 | 8                        | 406.9884              |
| Chr08_41565937 | 8                        | 422.5681              |
| Chr08_41565987 | 8                        | 422.5681              |
| Chr08_7547891  | 8                        | 436.8317              |
| Chr08_7547886  | 8                        | 436.8317              |
| Chr08_15726692 | 8                        | 461.2320              |
| Chr08_15726805 | 8                        | 466.9013              |
| Chr08_15717101 | 8                        | 488.5716              |
| Chr08_15717086 | 8                        | 488.5716              |
| Chr08_15717115 | 8                        | 488.5716              |
| Chr08_15717214 | 8                        | 488.5716              |
| Chr08_15717136 | 8                        | 488.5716              |
| Chr08_10851357 | 8                        | 507.7808              |
| Chr08_10851383 | 8                        | 507.7808              |
| Chr08_10851294 | 8                        | 507.7808              |
| Chr08_10851304 | 8                        | 507.7808              |
| Chr08_10851376 | 8                        | 507.7808              |
| Chr08_10851329 | 8                        | 507.7808              |
| Chr08_10851253 | 8                        | 507.7808              |
| Chr08_10851254 | 8                        | 507.7808              |
| Chr08_10851287 | 8                        | 507.7808              |
| Chr08_10851321 | 8                        | 507.7808              |
| Chr08_33185244 | 8                        | 517.9175              |
| Chr08_31935096 | 8                        | 525.4745              |

| Marker         | Linkage group/Chromosome | Genetic distance (cM) |
|----------------|--------------------------|-----------------------|
| Chr08_33204268 | 8                        | 535.0735              |
| Chr08_33228997 | 8                        | 539.8499              |
| Chr08_20286627 | 8                        | 547.9019              |
| Chr08_20286706 | 8                        | 547.9019              |
| Chr08_24789766 | 8                        | 556.4590              |
| Chr08_41361569 | 8                        | 564.5111              |
| Chr08_41361597 | 8                        | 564.5111              |
| Chr08_26691973 | 8                        | 570.6392              |
| Chr08_26692021 | 8                        | 571.3745              |
| Chr08_26803460 | 8                        | 575.2888              |
| Chr08_26803422 | 8                        | 575.2888              |
| Chr08_23994404 | 8                        | 581.4168              |
| Chr08_3640802  | 8                        | 587.0861              |
| Chr08_3640805  | 8                        | 587.0861              |
| Chr08_62491552 | 8                        | 591.8625              |
| Chr08_62491500 | 8                        | 595.3565              |
| Chr08_24659988 | 8                        | 600.1329              |
| Chr08_43139628 | 8                        | 603.6269              |
| Chr08_26315867 | 8                        | 605.9012              |
| Chr08_50756977 | 8                        | 608.1755              |
| Chr08_50756978 | 8                        | 608.1755              |
| Chr08_42015006 | 8                        | 611.6695              |
| Chr08_23994357 | 8                        | 614.7503              |
| Chr08_25408068 | 8                        | 618.2443              |
| Chr08_26688098 | 8                        | 633.1573              |
| Chr08_26688009 | 8                        | 633.1573              |
| Chr08_14958690 | 8                        | 662.8970              |
| Chr08_14958652 | 8                        | 662.8970              |
| Chr08_14958741 | 8                        | 662.8970              |
| Chr08_14958818 | 8                        | 662.8970              |
| Chr09_684728   | 9                        | 0.0000                |
| Chr09_684802   | 9                        | 28.5766               |
| Chr09_684733   | 9                        | 28.5766               |
| Chr09_684797   | 9                        | 28.5766               |
| Chr09_8156355  | 9                        | 42.8402               |
| Chr09_8156370  | 9                        | 43.2052               |
| Chr09_8156412  | 9                        | 43.5702               |
| Chr09_8156375  | 9                        | 43.5702               |
| Chr09_8156372  | 9                        | 43.5702               |
| Chr09_8156423  | 9                        | 43.5702               |
| Chr09_8156367  | 9                        | 43.5702               |
| Chr09_8156350  | 9                        | 43.5702               |
| Chr09_8156356  | 9                        | 43.5702               |

| Marker         | Linkage group/Chromosome | Genetic distance (cM) |
|----------------|--------------------------|-----------------------|
| Chr09_11076608 | 9                        | 47.4844               |
| Chr09_14524277 | 9                        | 51.3986               |
| Chr09_14521032 | 9                        | 56.1750               |
| Chr09_14521049 | 9                        | 56.1750               |
| Chr09_14521031 | 9                        | 56.1750               |
| Chr09_14521023 | 9                        | 56.1750               |
| Chr09_14521024 | 9                        | 56.1750               |
| Chr09_14521056 | 9                        | 56.1750               |
| Chr09_14521021 | 9                        | 56.1750               |
| Chr09_14521051 | 9                        | 56.1750               |
| Chr09_3328917  | 9                        | 58.4493               |
| Chr09_3328944  | 9                        | 59.5606               |
| Chr09_689769   | 9                        | 65.2299               |
| Chr09_689743   | 9                        | 65.2299               |
| Chr09_689784   | 9                        | 65.2299               |
| Chr09_12340770 | 9                        | 70.8993               |
| Chr09_8158572  | 9                        | 74.8135               |
| Chr09_23131077 | 9                        | 77.8943               |
| Chr09_36875995 | 9                        | 80.5686               |
| Chr09_30387739 | 9                        | 82.4492               |
| Chr09_21457946 | 9                        | 91.3713               |
| Chr09_28853043 | 9                        | 109.0650              |
| Chr09_28853046 | 9                        | 109.0650              |
| Chr09_28853053 | 9                        | 109.0650              |
| Chr09_28853042 | 9                        | 109.0650              |
| Chr09_1127534  | 9                        | 128.2742              |
| Chr09_37391824 | 9                        | 130.1548              |
| Chr09_689732   | 9                        | 132.8291              |
| Chr09_36803453 | 9                        | 141.9017              |
| Chr09_37393531 | 9                        | 175.4951              |
| Chr09_14396957 | 9                        | 223.7831              |
| Chr09_13851250 | 9                        | 225.6637              |
| Chr09_13851142 | 9                        | 225.6637              |
| Chr09_13851130 | 9                        | 225.6637              |
| Chr09_13851109 | 9                        | 225.6637              |
| Chr09_17827630 | 9                        | 250.0640              |
| Chr09_14413295 | 9                        | 270.0670              |
| Chr09_7153986  | 9                        | 296.4683              |
| Chr09_7153858  | 9                        | 296.4683              |
| Chr09_21353248 | 9                        | 302.5963              |
| Chr09_21353259 | 9                        | 302.5963              |
| Chr09_15131266 | 9                        | 332.3359              |
| Chr09_14927587 | 9                        | 332.7009              |

| Marker         | Linkage group/Chromosome | Genetic distance (cM) |
|----------------|--------------------------|-----------------------|
| Chr09_15147377 | 9                        | 332.7009              |
| Chr09_13631531 | 9                        | 333.8122              |
| Chr09_13569085 | 9                        | 333.8122              |
| Chr09_13348489 | 9                        | 333.8122              |
| Chr09_13710454 | 9                        | 333.8122              |
| Chr09_14241149 | 9                        | 348.7252              |
| Chr09_14021761 | 9                        | 349.8365              |
| Chr09_14073616 | 9                        | 350.5718              |
| Chr09_14073270 | 9                        | 350.5718              |
| Chr09_14073256 | 9                        | 350.5718              |
| Chr09_14094281 | 9                        | 351.3072              |
| Chr09_14094304 | 9                        | 351.3072              |
| Chr09_14094330 | 9                        | 351.3072              |
| Chr09_14094355 | 9                        | 351.3072              |
| Chr09_14094358 | 9                        | 351.3072              |
| Chr09_14094400 | 9                        | 351.3072              |
| Chr09_14093983 | 9                        | 352.0425              |
| Chr09_13929663 | 9                        | 353.1538              |
| Chr09_13927412 | 9                        | 353.8892              |
| Chr09_14549725 | 9                        | 355.7697              |
| Chr09_14549671 | 9                        | 355.7697              |
| Chr09_14549647 | 9                        | 355.7697              |
| Chr09_14549293 | 9                        | 355.7697              |
| Chr09_14549239 | 9                        | 355.7697              |
| Chr09_14302310 | 9                        | 356.8810              |
| Chr09_14307521 | 9                        | 357.2460              |
| Chr09_14257096 | 9                        | 357.6110              |
| Chr09_14413296 | 9                        | 359.1039              |
| Chr09_14413310 | 9                        | 359.8393              |
| Chr09_14413346 | 9                        | 365.9673              |
| Chr09_14413327 | 9                        | 365.9673              |
| Chr09_14413294 | 9                        | 365.9673              |
| Chr09_14413293 | 9                        | 365.9673              |
| Chr09_21431512 | 9                        | 388.5149              |
| Chr09_21065372 | 9                        | 388.8799              |
| Chr09_21061231 | 9                        | 388.8799              |
| Chr09_21061224 | 9                        | 388.8799              |
| Chr09_21058018 | 9                        | 388.8799              |
| Chr09_21057981 | 9                        | 388.8799              |
| Chr09_21057977 | 9                        | 388.8799              |
| Chr09_21057956 | 9                        | 388.8799              |
| Chr09_21057945 | 9                        | 388.8799              |
| Chr09_20865151 | 9                        | 389.6152              |

| Marker         | Linkage group/Chromosome | Genetic distance (cM) |
|----------------|--------------------------|-----------------------|
| Chr09_21065561 | 9                        | 390.3506              |
| Chr09_21336320 | 9                        | 390.7155              |
| Chr09_21393904 | 9                        | 390.7155              |
| Chr09_21393829 | 9                        | 392.5961              |
| Chr09_36892380 | 9                        | 429.1340              |
| Chr09_36943156 | 9                        | 430.6270              |
| Chr09_37297003 | 9                        | 433.3013              |
| Chr09_37393466 | 9                        | 434.7943              |
| Chr09_37393467 | 9                        | 434.7943              |
| Chr09_37393458 | 9                        | 434.7943              |
| Chr09_37562630 | 9                        | 435.1592              |
| Chr09_37559648 | 9                        | 435.5242              |
| Chr10_44163360 | 10                       | 0.0000                |
| Chr10_44163306 | 10                       | 7.0716                |
| Chr10_42980097 | 10                       | 30.5283               |
| Chr10_42796336 | 10                       | 33.2026               |
| Chr10_42796346 | 10                       | 33.2026               |
| Chr10_42796391 | 10                       | 33.2026               |
| Chr10_42780789 | 10                       | 34.6956               |
| Chr10_42158874 | 10                       | 41.2910               |
| Chr10_36936554 | 10                       | 62.9612               |
| Chr10_16311746 | 10                       | 65.2355               |
| Chr10_30925792 | 10                       | 66.3468               |
| Chr10_28672525 | 10                       | 66.7118               |
| Chr10_25160981 | 10                       | 67.4471               |
| Chr10_25869761 | 10                       | 67.4471               |
| Chr10_27497120 | 10                       | 67.4471               |
| Chr10_9231306  | 10                       | 68.5584               |
| Chr10_9231678  | 10                       | 68.5584               |
| Chr10_7225757  | 10                       | 69.2938               |
| Chr10_674482   | 10                       | 83.5574               |
| Chr10_223601   | 10                       | 87.0514               |
| Chr10_382346   | 10                       | 88.5444               |
| Chr10_2745368  | 10                       | 96.1014               |
| Chr10_3071850  | 10                       | 111.6812              |
| Chr10_7976422  | 10                       | 125.9448              |
| Chr10_7829492  | 10                       | 138.9581              |
| Chr10_13826228 | 10                       | 145.0862              |
| Chr10_12412979 | 10                       | 147.7605              |
| Chr10_12412991 | 10                       | 150.8413              |
| Chr10_15461213 | 10                       | 155.1829              |
| Chr10_7829481  | 10                       | 160.4018              |
| Chr10_17250799 | 10                       | 163.4826              |

| Marker         | Linkage group/Chromosome | Genetic distance (cM) |
|----------------|--------------------------|-----------------------|
| Chr10_14646320 | 10                       | 166.1569              |
| Chr10_14646632 | 10                       | 171.3758              |
| Chr10_246924   | 10                       | 185.0064              |
| Chr10_246939   | 10                       | 185.0064              |
| Chr10_246825   | 10                       | 185.0064              |
| Chr10_246953   | 10                       | 185.0064              |
| Chr10_246951   | 10                       | 185.0064              |
| Chr10_44163355 | 10                       | 196.8291              |
| Chr10_44163292 | 10                       | 197.9404              |
| Chr10_23090260 | 10                       | 209.1883              |
| Chr10_382160   | 10                       | 217.2404              |
| Chr10_381956   | 10                       | 220.7345              |
| Chr10_223550   | 10                       | 225.5108              |
| Chr10_39999933 | 10                       | 232.1062              |
| Chr10_36679047 | 10                       | 235.6003              |
| Chr10_44163331 | 10                       | 247.4229              |
| Chr10_44163304 | 10                       | 270.8797              |
| Chr10_44163289 | 10                       | 270.8797              |
| Chr10_42497774 | 10                       | 295.2799              |
| Chr10_43002937 | 10                       | 312.2489              |
| Chr10_43204200 | 10                       | 314.9232              |
| Chr10_43204121 | 10                       | 314.9232              |
| Chr10_16398573 | 10                       | 349.9455              |
| Chr10_29106685 | 10                       | 351.0568              |
| Chr10_33258393 | 10                       | 351.7921              |
| Chr10_33172577 | 10                       | 352.1571              |
| Chr10_26515975 | 10                       | 352.8925              |
| Chr10_9588970  | 10                       | 354.3854              |
| Chr10_9589084  | 10                       | 354.3854              |
| Chr10_7718371  | 10                       | 355.4967              |
| Chr10_7229868  | 10                       | 355.8617              |
| Chr10_7142884  | 10                       | 355.8617              |
| Chr10_1474862  | 10                       | 368.2726              |
| Chr10_882694   | 10                       | 370.5469              |
| Chr10_181788   | 10                       | 372.4275              |
| Chr10_375925   | 10                       | 372.7924              |
| Chr10_382208   | 10                       | 372.7924              |
| Chr10_382078   | 10                       | 372.7924              |
| Chr10_382286   | 10                       | 372.7924              |
| Chr10_246950   | 10                       | 373.5278              |
| Chr10_246870   | 10                       | 373.5278              |
| Chr10_246875   | 10                       | 399.9291              |
| Chr10_246824   | 10                       | 399.9291              |



| Marker         | Linkage group/Chromosome | Genetic distance (cM) |
|----------------|--------------------------|-----------------------|
| Chr10_246866   | 10                       | 399.9291              |
| Chr10_246883   | 10                       | 399.9291              |
| Chr10_246826   | 10                       | 399.9291              |
| Chr10_36144416 | 10                       | 424.3293              |
| Chr10_36144409 | 10                       | 424.3293              |
| Chr10_36679010 | 10                       | 460.8673              |
| Chr10_36679008 | 10                       | 491.8267              |
| Chr10_15835662 | 10                       | 507.4064              |
| Chr10_15835762 | 10                       | 507.4064              |
| Chr10_36679045 | 10                       | 518.0925              |
| Chr10_31729606 | 10                       | 529.9151              |
| Chr10_14646635 | 10                       | 542.3260              |
| Chr10_26164207 | 10                       | 559.2950              |
| Chr10_10559294 | 10                       | 567.3470              |
| Chr10_7976376  | 10                       | 578.5950              |
| Chr10_7976427  | 10                       | 578.5950              |
| Chr10_7976394  | 10                       | 578.5950              |
| Chr10_18617025 | 10                       | 596.2886              |
| Chr10_43557923 | 10                       | 621.6694              |
| Chr11_32484934 | 11                       | 0.0000                |
| Chr11_32484898 | 11                       | 0.0000                |
| Chr11_24074141 | 11                       | 25.3808               |
| Chr11_18098565 | 11                       | 34.9797               |
| Chr11_24485850 | 11                       | 43.0318               |
| Chr11_24485992 | 11                       | 43.3968               |
| Chr11_24485875 | 11                       | 43.3968               |
| Chr11_41152165 | 11                       | 54.6447               |
| Chr11_41152152 | 11                       | 54.6447               |
| Chr11_41152113 | 11                       | 54.6447               |
| Chr11_41152092 | 11                       | 54.6447               |
| Chr11_41152084 | 11                       | 54.6447               |
| Chr11_41152047 | 11                       | 54.6447               |
| Chr11_15927065 | 11                       | 64.2437               |
| Chr11_15927035 | 11                       | 64.2437               |
| Chr11_37278734 | 11                       | 69.9130               |
| Chr11_37278735 | 11                       | 69.9130               |
| Chr11_37278740 | 11                       | 69.9130               |
| Chr11_37278870 | 11                       | 69.9130               |
| Chr11_51092570 | 11                       | 76.5084               |
| Chr11_51092640 | 11                       | 76.5084               |
| Chr11_23895904 | 11                       | 80.4226               |
| Chr11_23895948 | 11                       | 80.4226               |
| Chr11_23895955 | 11                       | 80.4226               |

| Marker         | Linkage group/Chromosome | Genetic distance (cM) |
|----------------|--------------------------|-----------------------|
| Chr11_23895956 | 11                       | 80.4226               |
| Chr11_46695588 | 11                       | 82.3032               |
| Chr11_26063150 | 11                       | 84.9775               |
| Chr11_26063196 | 11                       | 84.9775               |
| Chr11_35032972 | 11                       | 88.0583               |
| Chr11_32203017 | 11                       | 90.7326               |
| Chr11_35331950 | 11                       | 94.2267               |
| Chr11_1259272  | 11                       | 100.8220              |
| Chr11_1259270  | 11                       | 100.8220              |
| Chr11_1259266  | 11                       | 100.8220              |
| Chr11_1259276  | 11                       | 100.8220              |
| Chr11_26440772 | 11                       | 109.8947              |
| Chr11_26440761 | 11                       | 121.1426              |
| Chr11_26440787 | 11                       | 121.1426              |
| Chr11_26440899 | 11                       | 121.1426              |
| Chr11_22028674 | 11                       | 144.5993              |
| Chr11_22028703 | 11                       | 144.5993              |
| Chr11_22028700 | 11                       | 144.5993              |
| Chr11_22761001 | 11                       | 152.6514              |
| Chr11_23141174 | 11                       | 161.2086              |
| Chr11_23348901 | 11                       | 168.7656              |
| Chr11_23348799 | 11                       | 168.7656              |
| Chr11_23348929 | 11                       | 168.7656              |
| Chr11_23348753 | 11                       | 168.7656              |
| Chr11_21542673 | 11                       | 177.8382              |
| Chr11_2302038  | 11                       | 186.3954              |
| Chr11_497609   | 11                       | 202.6601              |
| Chr11_4751895  | 11                       | 213.3462              |
| Chr11_37865248 | 11                       | 221.9034              |
| Chr11_37865291 | 11                       | 221.9034              |
| Chr11_37865294 | 11                       | 221.9034              |
| Chr11_37865295 | 11                       | 221.9034              |
| Chr11_37865328 | 11                       | 221.9034              |
| Chr11_37865337 | 11                       | 221.9034              |
| Chr11_473239   | 11                       | 246.3036              |
| Chr11_473334   | 11                       | 246.3036              |
| Chr11_482505   | 11                       | 246.3036              |
| Chr11_1285764  | 11                       | 249.7976              |
| Chr11_982792   | 11                       | 263.4283              |
| Chr11_2313784  | 11                       | 285.9759              |
| Chr11_2382238  | 11                       | 289.8901              |
| Chr11_2419651  | 11                       | 290.2550              |
| Chr11_2448093  | 11                       | 290.6200              |

| Marker         | Linkage group/Chromosome | Genetic distance (cM) |
|----------------|--------------------------|-----------------------|
| Chr11_2435242  | 11                       | 290.9850              |
| Chr11_3260440  | 11                       | 296.2038              |
| Chr11_3238161  | 11                       | 296.2038              |
| Chr11_4103315  | 11                       | 301.8732              |
| Chr11_42487761 | 11                       | 350.1612              |
| Chr11_42487756 | 11                       | 350.1612              |
| Chr11_42487799 | 11                       | 350.1612              |
| Chr11_42487785 | 11                       | 383.7546              |
| Chr11_42487757 | 11                       | 383.7546              |
| Chr11_42487728 | 11                       | 383.7546              |
| Chr11_33686091 | 11                       | 407.2113              |
| Chr11_33685994 | 11                       | 407.2113              |
| Chr11_37865243 | 11                       | 432.5921              |
| Chr11_48352437 | 11                       | 452.5951              |
| Chr11_18145008 | 11                       | 456.9366              |
| Chr11_51718031 | 11                       | 472.5164              |
| Chr11_32484897 | 11                       | 491.7256              |
| Chr11_26622766 | 11                       | 509.4193              |
| Chr11_1095432  | 11                       | 527.1129              |
| Chr11_140358   | 11                       | 535.1650              |
| Chr11_473259   | 11                       | 546.4129              |
| Chr11_473241   | 11                       | 546.4129              |
| Chr11_468484   | 11                       | 547.5242              |
| Chr11_458691   | 11                       | 548.6354              |
| Chr11_465161   | 11                       | 549.7467              |
| Chr11_465399   | 11                       | 549.7467              |
| Chr11_465411   | 11                       | 549.7467              |
| Chr11_465417   | 11                       | 549.7467              |
| Chr11_273955   | 11                       | 550.4821              |
| Chr11_182056   | 11                       | 550.4821              |
| Chr11_273943   | 11                       | 550.4821              |
| Chr11_273877   | 11                       | 550.4821              |
| Chr11_273776   | 11                       | 550.4821              |
| Chr11_248569   | 11                       | 550.4821              |
| Chr11_238590   | 11                       | 550.4821              |
| Chr11_238554   | 11                       | 550.4821              |
| Chr11_233454   | 11                       | 550.4821              |
| Chr11_238525   | 11                       | 550.4821              |
| Chr11_238519   | 11                       | 550.4821              |
| Chr11_233555   | 11                       | 550.4821              |
| Chr11_238186   | 11                       | 550.4821              |
| Chr11_238320   | 11                       | 550.4821              |
| Chr11_238240   | 11                       | 550.4821              |

| Marker        | Linkage group/Chromosome | Genetic distance (cM) |
|---------------|--------------------------|-----------------------|
| Chr11_238287  | 11                       | 550.4821              |
| Chr11_182185  | 11                       | 550.4821              |
| Chr11_182141  | 11                       | 550.4821              |
| Chr11_182211  | 11                       | 550.4821              |
| Chr11_182074  | 11                       | 550.4821              |
| Chr11_181992  | 11                       | 550.4821              |
| Chr11_171523  | 11                       | 550.4821              |
| Chr11_147523  | 11                       | 550.8470              |
| Chr11_147591  | 11                       | 550.8470              |
| Chr11_147530  | 11                       | 550.8470              |
| Chr11_147443  | 11                       | 550.8470              |
| Chr11_147422  | 11                       | 550.8470              |
| Chr11_50534   | 11                       | 550.8470              |
| Chr11_78636   | 11                       | 550.8470              |
| Chr11_50525   | 11                       | 550.8470              |
| Chr11_32586   | 11                       | 550.8470              |
| Chr11_32488   | 11                       | 550.8470              |
| Chr11_147600  | 11                       | 550.8470              |
| Chr11_17856   | 11                       | 553.5214              |
| Chr11_147405  | 11                       | 556.1957              |
| Chr11_238479  | 11                       | 556.5607              |
| Chr11_274004  | 11                       | 556.5607              |
| Chr11_465463  | 11                       | 557.2960              |
| Chr11_312041  | 11                       | 557.6610              |
| Chr11_986764  | 11                       | 571.2917              |
| Chr11_1276847 | 11                       | 573.1723              |
| Chr11_1276594 | 11                       | 587.4359              |
| Chr11_1276342 | 11                       | 587.4359              |
| Chr11_1276317 | 11                       | 587.4359              |
| Chr11_1276300 | 11                       | 587.4359              |
| Chr11_2313817 | 11                       | 611.8362              |
| Chr11_2313854 | 11                       | 611.8362              |
| Chr11_2313872 | 11                       | 611.8362              |
| Chr11_2313880 | 11                       | 611.8362              |
| Chr11_2302047 | 11                       | 614.9170              |
| Chr11_2302076 | 11                       | 614.9170              |
| Chr11_2302126 | 11                       | 614.9170              |
| Chr11_2301919 | 11                       | 614.9170              |
| Chr11_4256026 | 11                       | 627.9304              |
| Chr11_5002346 | 11                       | 662.9527              |
