# Supplementary material for: Quantitative Trait Locus Mapping of Marsh Spot Disease Resistance in Cranberry Common Bean (Phaseolus vulgaris L.)
Source: MDPI journal article supplement (doi:10.3390/ijms23147639), 2022-07-11
Supplement: s1 [file s1]

**Table S2.** Statistics of single nucleotide polymorphism (SNP) identification from the 138 recombinant inbred lines (RILs) and two parents

| Chromosome | Total SNPs | SNPs with MAF $\geq 0.05$ , call rate $\geq 20\%$ and polymorphic between two parents |
|------------|------------|---------------------------------------------------------------------------------------|
| 1          | 3,892      | 174                                                                                   |
| 2          | 6,261      | 377                                                                                   |
| 3          | 4,390      | 162                                                                                   |
| 4          | 5,251      | 203                                                                                   |
| 5          | 5,061      | 318                                                                                   |
| 6          | 2,857      | 100                                                                                   |
| 7          | 3,880      | 95                                                                                    |
| 8          | 6,542      | 105                                                                                   |
| 9          | 3,042      | 111                                                                                   |
| 10         | 3,811      | 93                                                                                    |
| 11         | 7,689      | 150                                                                                   |
| Scaffolds  | 1,944      | 170                                                                                   |
| Total      | 54,620     | 2,058                                                                                 |

MAF: minor allele frequency
