# Supplementary material for: Quantitative Trait Locus Mapping of Marsh Spot Disease Resistance in Cranberry Common Bean (Phaseolus vulgaris L.)
Source: MDPI journal article supplement (doi:10.3390/ijms23147639), 2022-07-11
Supplement: s1 [file s1]

**Table S5.** Relative contribution (%) of each quantitative trait loci (QTL) to the marsh spot resistance index (MSRI) of the 138 recombinant inbred lines (RILs) across 5 years and two soil types (sandy and heavy clay).

| Dataset/C | QTL.1.1 | QTL.2.1 | QTL.2.2 | QTL.2.3 | QTL.2.4 | QTL.2.5 | QTL.2.6 | QTL.3.1 | QTL.3.2 | QTL.5.1 | QTL.5.2 | QTL.5.3 | QTL.5.4 | QTL.6.1 | QTL.6.2 | QTL.9.1 |
|-----------|---------|---------|---------|---------|---------|---------|---------|---------|---------|---------|---------|---------|---------|---------|---------|---------|
| H2015     | 6.71    | 10.72   | 4.77    | 5.58    | 3.27    | 5.69    | 8.96    | 11.07   | 10.19   | 1.65    | 4.46    | 15.31   | 8.01    | 2.21    | 1.24    | 0.16    |
| H2016     | 1.18    | 11.61   | 5.27    | 4.75    | 2.57    | 6.07    | 15.83   | 8.73    | 13.62   | 0.90    | 7.86    | 6.31    | 6.71    | 3.43    | 1.83    | 3.34    |
| H2017     | 6.11    | 5.86    | 9.02    | 6.29    | 3.08    | 5.48    | 5.25    | 10.52   | 4.89    | 1.19    | 9.60    | 6.04    | 10.63   | 9.68    | 6.22    | 0.15    |
| H2018     | 5.16    | 17.99   | 4.49    | 5.52    | 4.67    | 4.45    | 7.47    | 8.33    | 7.14    | 0.93    | 3.94    | 4.24    | 19.16   | 1.96    | 2.61    | 1.94    |
| H2019     | 7.35    | 6.39    | 4.08    | 5.31    | 5.79    | 8.22    | 7.72    | 8.68    | 8.31    | 4.94    | 5.86    | 0.66    | 15.10   | 5.43    | 6.03    | 0.12    |
| S2015     | 1.28    | 3.63    | 3.82    | 3.91    | 2.30    | 7.11    | 9.65    | 6.72    | 10.66   | 2.89    | 7.26    | 8.64    | 17.12   | 8.67    | 5.28    | 1.06    |
| S2016     | 2.17    | 8.80    | 6.05    | 6.12    | 2.97    | 7.88    | 15.99   | 7.65    | 12.58   | 0.93    | 8.23    | 9.05    | 5.68    | 1.59    | 2.91    | 1.41    |
| S2017     | 6.70    | 8.84    | 2.34    | 4.05    | 2.68    | 5.15    | 5.92    | 2.84    | 5.86    | 1.13    | 3.95    | 26.14   | 13.50   | 6.56    | 2.62    | 1.72    |
| S2018     | 5.38    | 10.20   | 1.72    | 2.13    | 1.58    | 4.58    | 5.62    | 7.17    | 4.20    | 1.20    | 8.07    | 18.08   | 13.67   | 9.87    | 5.67    | 0.86    |
| S2019     | 10.27   | 7.92    | 3.56    | 4.50    | 2.61    | 7.98    | 2.78    | 3.62    | 2.12    | 5.69    | 6.49    | 16.82   | 9.83    | 4.86    | 5.97    | 5.01    |
| T2015     | 3.89    | 7.29    | 4.56    | 5.03    | 2.93    | 6.20    | 9.49    | 9.23    | 10.65   | 2.14    | 5.96    | 12.54   | 12.21   | 4.70    | 2.83    | 0.33    |
| T2016     | 1.52    | 9.89    | 5.89    | 5.61    | 2.94    | 7.34    | 16.11   | 8.61    | 13.18   | 0.64    | 8.11    | 7.60    | 6.14    | 2.05    | 2.20    | 2.17    |
| T2017     | 7.04    | 8.15    | 4.73    | 5.07    | 2.66    | 5.23    | 6.13    | 5.79    | 5.92    | 0.81    | 6.64    | 16.75   | 13.18   | 8.22    | 3.09    | 0.60    |
| T2018     | 5.88    | 16.01   | 2.80    | 4.09    | 2.83    | 4.61    | 6.76    | 8.07    | 5.75    | 1.10    | 5.35    | 9.30    | 17.48   | 4.60    | 3.75    | 1.61    |
| T2019     | 9.97    | 8.07    | 4.46    | 5.53    | 3.46    | 9.65    | 5.83    | 7.51    | 5.09    | 1.23    | 6.94    | 2.75    | 15.64   | 6.13    | 7.14    | 0.60    |
| H-5 yrs   | 5.58    | 10.91   | 5.60    | 6.01    | 3.91    | 6.28    | 9.02    | 10.11   | 9.08    | 1.51    | 6.00    | 4.60    | 13.08   | 4.31    | 3.67    | 0.33    |
| S-5 yrs   | 5.03    | 8.85    | 3.18    | 4.13    | 2.20    | 7.09    | 8.20    | 5.72    | 6.85    | 0.87    | 7.57    | 16.63   | 13.30   | 5.95    | 3.54    | 0.90    |
| Overall   | 5.55    | 10.33   | 4.42    | 5.14    | 2.67    | 6.56    | 8.93    | 8.14    | 8.27    | 1.04    | 6.79    | 9.45    | 13.48   | 5.01    | 3.59    | 0.63    |

H: heavy clay soil; S: sandy soil; T: means of years over two soil types; H-5 yrs: means of heavy clay soil over five years; S-5 yrs: means of sandy soil over five years; Overall: means over five years and two soil types.
