# Supplementary material for: Quantitative Trait Locus Mapping of Marsh Spot Disease Resistance in Cranberry Common Bean (Phaseolus vulgaris L.)
Source: MDPI journal article supplement (doi:10.3390/ijms23147639), 2022-07-11
Supplement: s1 [file s1]

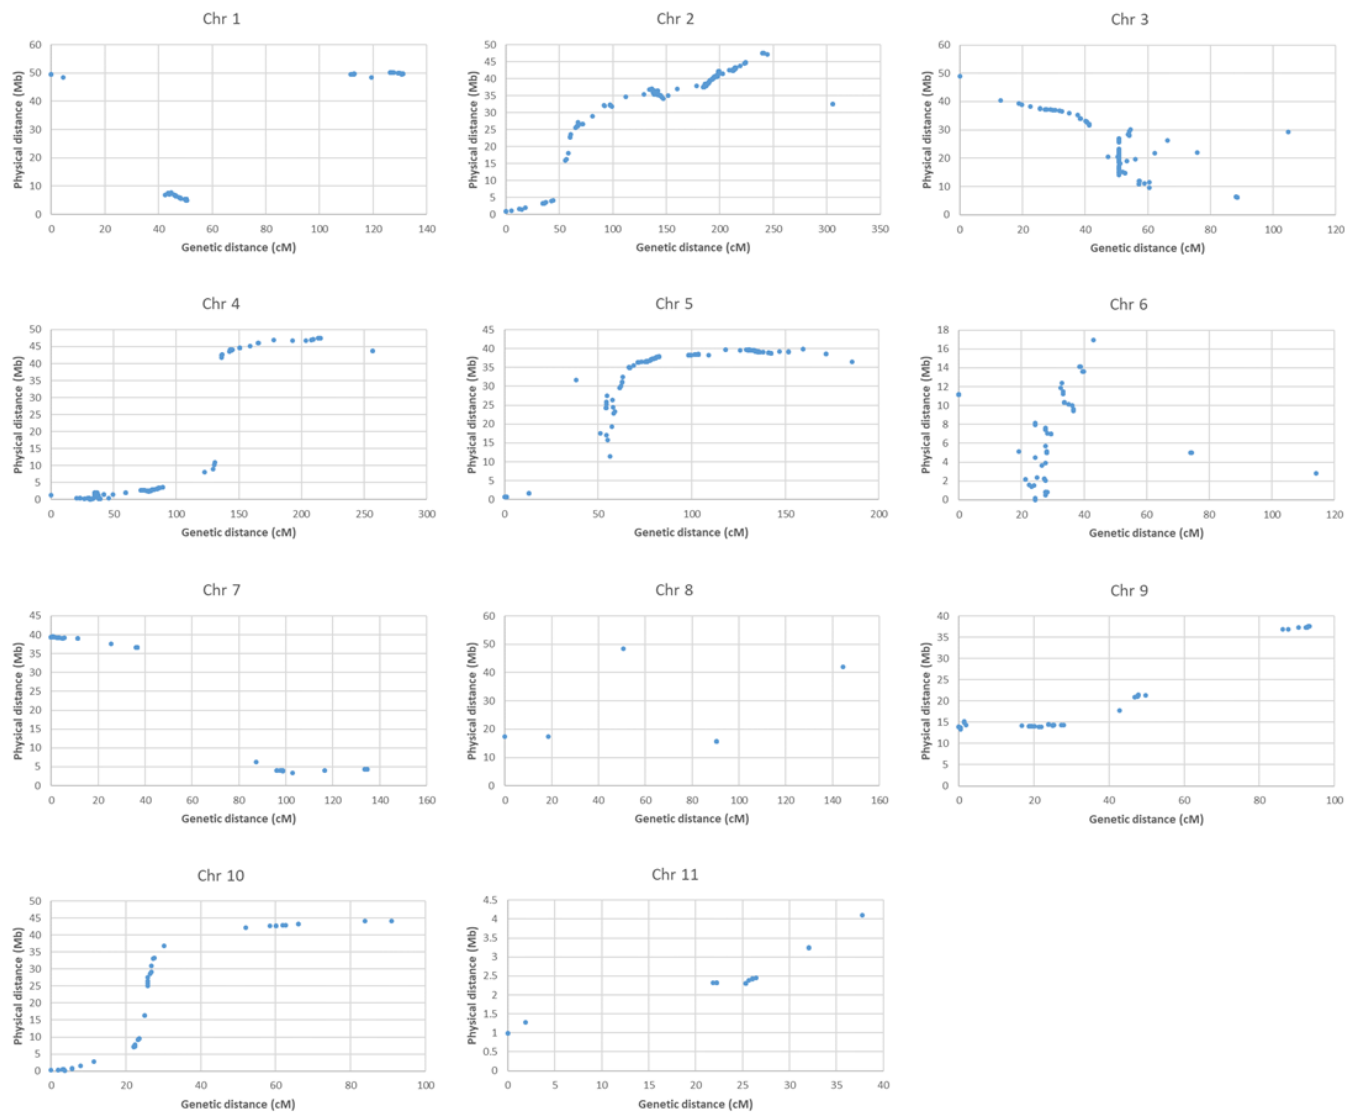

**Figure S2.** Relationship between genetic distance (cM) and physical distance (Mb) in 11 chromosomes. Some markers from scaffolds that have not been assigned to chromosomes and from different chromosomes were excluded.
