# Supplementary material for: Quantitative Trait Locus Mapping of Marsh Spot Disease Resistance in Cranberry Common Bean (Phaseolus vulgaris L.)
Source: MDPI journal article supplement (doi:10.3390/ijms23147639), 2022-07-11
Supplement: s1 [file s1]

**Table S6.** Candidate genes across whole reference genome.

| ID                      | Chr | Pos      | Gene families                                            |
|-------------------------|-----|----------|----------------------------------------------------------|
| <i>Phvul.001G088900</i> | 1   | 14088551 | YELLOW STRIPE like 6                                     |
| <i>Phvul.001G105400</i> | 1   | 26290093 | calcium exchanger 7                                      |
| <i>Phvul.001G105400</i> | 1   | 26290093 | calcium exchanger 7                                      |
| <i>Phvul.001G142750</i> | 1   | 38584393 | Cation efflux family protein                             |
| <i>Phvul.001G177500</i> | 1   | 43453927 | NRAMP metal ion transporter family protein               |
| <i>Phvul.001G179100</i> | 1   | 43666739 | Heavy metal transport/detoxification superfamily protein |
| <i>Phvul.001G179100</i> | 1   | 43666739 | Heavy metal transport/detoxification superfamily protein |
| <i>Phvul.001G205300</i> | 1   | 46324641 | Heavy metal transport/detoxification superfamily protein |
| <i>Phvul.001G247400</i> | 1   | 49894723 | Heavy metal transport/detoxification superfamily protein |
| <i>Phvul.001G250300</i> | 1   | 50100939 | Heavy metal transport/detoxification superfamily protein |
| <i>Phvul.001G250300</i> | 1   | 50100939 | Heavy metal transport/detoxification superfamily protein |
| <i>Phvul.001G250300</i> | 1   | 50100939 | Heavy metal transport/detoxification superfamily protein |
| <i>Phvul.002G033800</i> | 2   | 3382174  | Heavy metal transport/detoxification superfamily protein |
| <i>Phvul.002G033800</i> | 2   | 3382174  | Heavy metal transport/detoxification superfamily protein |
| <i>Phvul.002G099700</i> | 2   | 19275657 | zinc transporter 10 precursor                            |
| <i>Phvul.002G100001</i> | 2   | 19321798 | zinc transporter 10 precursor                            |
| <i>Phvul.002G113500</i> | 2   | 24370429 | Vacuolar iron transporter (VIT) family protein           |
| <i>Phvul.002G176300</i> | 2   | 33458683 | Cation efflux family protein                             |
| <i>Phvul.002G184200</i> | 2   | 34468080 | ZIP metal ion transporter family                         |
| <i>Phvul.002G205000</i> | 2   | 37162538 | Vacuolar iron transporter (VIT) family protein           |
| <i>Phvul.002G205100</i> | 2   | 37176246 | Vacuolar iron transporter (VIT) family protein           |
| <i>Phvul.002G205200</i> | 2   | 37188537 | Vacuolar iron transporter (VIT) family protein           |
| <i>Phvul.002G205300</i> | 2   | 37195863 | Vacuolar iron transporter (VIT) family protein           |
| <i>Phvul.002G208500</i> | 2   | 37516072 | Heavy metal transport/detoxification superfamily protein |
| <i>Phvul.002G262500</i> | 2   | 43427768 | Heavy metal transport/detoxification superfamily protein |
| <i>Phvul.002G285600</i> | 2   | 45486348 | Heavy metal transport/detoxification superfamily protein |
| <i>Phvul.002G292900</i> | 2   | 46189860 | Heavy metal transport/detoxification superfamily protein |
| <i>Phvul.002G314600</i> | 2   | 48136994 | Heavy metal transport/detoxification superfamily protein |
| <i>Phvul.002G322800</i> | 2   | 48774556 | vacuolar iron transporter 1                              |
| <i>Phvul.002G322900</i> | 2   | 48779470 | vacuolar iron transporter 1                              |
| <i>Phvul.002G323700</i> | 2   | 48857307 | vacuolar iron transporter 1                              |
| <i>Phvul.003G006400</i> | 3   | 760614   | YELLOW STRIPE like 7                                     |
| <i>Phvul.003G006500</i> | 3   | 765645   | YELLOW STRIPE like 7                                     |
| <i>Phvul.003G006500</i> | 3   | 765645   | YELLOW STRIPE like 7                                     |
| <i>Phvul.003G021300</i> | 3   | 2036314  | Cation efflux family protein                             |
| <i>Phvul.003G022400</i> | 3   | 2135327  | Heavy metal transport/detoxification superfamily protein |
| <i>Phvul.003G086300</i> | 3   | 16877488 | Heavy metal transport/detoxification superfamily protein |
| <i>Phvul.003G092500</i> | 3   | 21113140 | Heavy metal transport/detoxification superfamily protein |
| <i>Phvul.003G099700</i> | 3   | 25708027 | Heavy metal transport/detoxification superfamily protein |
| <i>Phvul.003G104900</i> | 3   | 23350962 | Heavy metal transport/detoxification superfamily protein |
| <i>Phvul.003G108900</i> | 3   | 27536901 | Heavy metal transport/detoxification superfamily protein |
| <i>Phvul.003G108900</i> | 3   | 27536901 | Heavy metal transport/detoxification superfamily protein |

| ID                      | Chr | Pos      | Gene families                                            |
|-------------------------|-----|----------|----------------------------------------------------------|
| <i>Phvul.003G108900</i> | 3   | 27536901 | Heavy metal transport/detoxification superfamily protein |
| <i>Phvul.003G219900</i> | 3   | 44817176 | Heavy metal transport/detoxification superfamily protein |
| <i>Phvul.003G262400</i> | 3   | 50155639 | zinc transporter 10 precursor                            |
| <i>Phvul.003G262500</i> | 3   | 50167952 | zinc transporter 10 precursor                            |
| <i>Phvul.004G001200</i> | 4   | 36383    | Heavy metal transport/detoxification superfamily protein |
| <i>Phvul.004G019800</i> | 4   | 2331722  | Heavy metal transport/detoxification superfamily protein |
| <i>Phvul.004G049800</i> | 4   | 6070640  | calcium exchanger 7                                      |
| <i>Phvul.004G052700</i> | 4   | 7006062  | Heavy metal transport/detoxification superfamily protein |
| <i>Phvul.004G077300</i> | 4   | 13645167 | Heavy metal transport/detoxification superfamily protein |
| <i>Phvul.004G096500</i> | 4   | 15848521 | Vacuolar iron transporter (VIT) family protein           |
| <i>Phvul.004G106900</i> | 4   | 35338479 | Heavy metal transport/detoxification superfamily protein |
| <i>Phvul.004G116300</i> | 4   | 40009283 | Heavy metal transport/detoxification superfamily protein |
| <i>Phvul.004G138900</i> | 4   | 43873548 | YELLOW STRIPE like 7                                     |
| <i>Phvul.004G161300</i> | 4   | 46564258 | Heavy metal transport/detoxification superfamily protein |
| <i>Phvul.005G048900</i> | 5   | 5682746  | zinc transporter 1 precursor                             |
| <i>Phvul.005G049300</i> | 5   | 5742223  | Cation efflux family protein                             |
| <i>Phvul.005G095400</i> | 5   | 29797811 | Heavy metal transport/detoxification superfamily protein |
| <i>Phvul.005G131500</i> | 5   | 37041480 | Heavy metal transport/detoxification superfamily protein |
| <i>Phvul.005G182000</i> | 5   | 40667944 | NRAMP metal ion transporter 6                            |
| <i>Phvul.005G182000</i> | 5   | 40667944 | NRAMP metal ion transporter 6                            |
| <i>Phvul.005G184600</i> | 5   | 40802614 | cation exchanger 2                                       |
| <i>Phvul.006G001000</i> | 6   | 321846   | zinc transporter 1 precursor                             |
| <i>Phvul.006G015061</i> | 6   | 2386258  | YELLOW STRIPE like 1                                     |
| <i>Phvul.006G060800</i> | 6   | 16929318 | cation exchanger 5                                       |
| <i>Phvul.006G060800</i> | 6   | 16929318 | cation exchanger 5                                       |
| <i>Phvul.006G067900</i> | 6   | 17933066 | cation exchanger 1                                       |
| <i>Phvul.006G070200</i> | 6   | 18248775 | ZIP metal ion transporter family                         |
| <i>Phvul.006G080700</i> | 6   | 19279972 | Cation efflux family protein                             |
| <i>Phvul.006G080700</i> | 6   | 19279972 | Cation efflux family protein                             |
| <i>Phvul.006G083800</i> | 6   | 19564418 | YELLOW STRIPE like 7                                     |
| <i>Phvul.006G093300</i> | 6   | 20450587 | cation exchanger 11                                      |
| <i>Phvul.006G139900</i> | 6   | 24687127 | Heavy metal transport/detoxification superfamily protein |
| <i>Phvul.006G139900</i> | 6   | 24687127 | Heavy metal transport/detoxification superfamily protein |
| <i>Phvul.006G139900</i> | 6   | 24687127 | Heavy metal transport/detoxification superfamily protein |
| <i>Phvul.006G153400</i> | 6   | 25863506 | Heavy metal transport/detoxification superfamily protein |
| <i>Phvul.007G079100</i> | 7   | 7671485  | Vacuolar iron transporter (VIT) family protein           |
| <i>Phvul.008G015500</i> | 8   | 1278190  | Cation efflux family protein                             |
| <i>Phvul.008G015500</i> | 8   | 1278190  | Cation efflux family protein                             |
| <i>Phvul.008G015500</i> | 8   | 1278190  | Cation efflux family protein                             |
| <i>Phvul.008G015500</i> | 8   | 1278190  | Cation efflux family protein                             |
| <i>Phvul.008G015500</i> | 8   | 1278190  | Cation efflux family protein                             |
| <i>Phvul.008G058500</i> | 8   | 5220363  | Heavy metal transport/detoxification superfamily protein |
| <i>Phvul.008G070000</i> | 8   | 6339674  | vacuolar iron transporter 1                              |

| ID                      | Chr | Pos      | Gene families                                            |
|-------------------------|-----|----------|----------------------------------------------------------|
| <i>Phvul.008G079500</i> | 8   | 7719539  | ZIP metal ion transporter family                         |
| <i>Phvul.008G104500</i> | 8   | 11470299 | cation exchanger 1                                       |
| <i>Phvul.008G157800</i> | 8   | 28064702 | YELLOW STRIPE like 3                                     |
| <i>Phvul.008G157800</i> | 8   | 28064702 | YELLOW STRIPE like 3                                     |
| <i>Phvul.008G157800</i> | 8   | 28064702 | YELLOW STRIPE like 3                                     |
| <i>Phvul.008G187600</i> | 8   | 52505573 | Vacuolar iron transporter (VIT) family protein           |
| <i>Phvul.008G187600</i> | 8   | 52505573 | Vacuolar iron transporter (VIT) family protein           |
| <i>Phvul.008G187600</i> | 8   | 52505573 | Vacuolar iron transporter (VIT) family protein           |
| <i>Phvul.008G187600</i> | 8   | 52505573 | Vacuolar iron transporter (VIT) family protein           |
| <i>Phvul.008G187600</i> | 8   | 52505573 | Vacuolar iron transporter (VIT) family protein           |
| <i>Phvul.008G187600</i> | 8   | 52505573 | Vacuolar iron transporter (VIT) family protein           |
| <i>Phvul.008G189300</i> | 8   | 52746631 | Heavy metal transport/detoxification superfamily protein |
| <i>Phvul.008G189400</i> | 8   | 52754968 | Heavy metal transport/detoxification superfamily protein |
| <i>Phvul.008G216200</i> | 8   | 56526044 | Heavy metal transport/detoxification superfamily protein |
| <i>Phvul.008G219600</i> | 8   | 56886320 | Heavy metal transport/detoxification superfamily protein |
| <i>Phvul.008G244200</i> | 8   | 59266794 | Cation efflux family protein                             |
| <i>Phvul.008G254900</i> | 8   | 60275655 | Cation efflux family protein                             |
| <i>Phvul.008G259200</i> | 8   | 60615253 | ZIP metal ion transporter family                         |
| <i>Phvul.008G261500</i> | 8   | 60843461 | cation exchanger 1                                       |
| <i>Phvul.009G027600</i> | 9   | 6422756  | Heavy metal transport/detoxification superfamily protein |
| <i>Phvul.009G038800</i> | 9   | 8217549  | Heavy metal transport/detoxification superfamily protein |
| <i>Phvul.009G038800</i> | 9   | 8217549  | Heavy metal transport/detoxification superfamily protein |
| <i>Phvul.009G038800</i> | 9   | 8217549  | Heavy metal transport/detoxification superfamily protein |
| <i>Phvul.009G038800</i> | 9   | 8217549  | Heavy metal transport/detoxification superfamily protein |
| <i>Phvul.009G040800</i> | 9   | 8411105  | vacuolar iron transporter (VIT) family protein           |
| <i>Phvul.009G040800</i> | 9   | 8411105  | vacuolar iron transporter (VIT) family protein           |
| <i>Phvul.009G040800</i> | 9   | 8411105  | vacuolar iron transporter (VIT) family protein           |
| <i>Phvul.009G048800</i> | 9   | 9593088  | YELLOW STRIPE like 3                                     |
| <i>Phvul.009G048800</i> | 9   | 9593088  | YELLOW STRIPE like 3                                     |
| <i>Phvul.009G069700</i> | 9   | 12141306 | NRAMP metal ion transporter 2                            |
| <i>Phvul.009G127900</i> | 9   | 19429094 | NRAMP metal ion transporter 6                            |
| <i>Phvul.009G127900</i> | 9   | 19429094 | NRAMP metal ion transporter 6                            |
| <i>Phvul.009G137100</i> | 9   | 20653368 | manganese tracking factor for mitochondrial SOD2         |
| <i>Phvul.009G164900</i> | 9   | 24527982 | Heavy metal transport/detoxification superfamily protein |
| <i>Phvul.009G247600</i> | 9   | 36846305 | Heavy metal transport/detoxification superfamily protein |
| <i>Phvul.010G001500</i> | 10  | 412065   | cation exchanger 3                                       |
| <i>Phvul.010G001500</i> | 10  | 412065   | cation exchanger 3                                       |
| <i>Phvul.010G021600</i> | 10  | 3076479  | Vacuolar iron transporter (VIT) family protein           |
| <i>Phvul.010G021700</i> | 10  | 3083937  | vacuolar iron transporter (VIT) family protein           |
| <i>Phvul.010G034132</i> | 10  | 4957830  | Heavy metal transport/detoxification superfamily protein |
| <i>Phvul.010G059200</i> | 10  | 9326694  | ZIP metal ion transporter family                         |
| <i>Phvul.010G103800</i> | 10  | 37309047 | Heavy metal transport/detoxification superfamily protein |

| ID                      | Chr          | Pos      | Gene families                                            |
|-------------------------|--------------|----------|----------------------------------------------------------|
| <i>Phvul.010G103800</i> | 10           | 37309047 | Heavy metal transport/detoxification superfamily protein |
| <i>Phvul.010G110500</i> | 10           | 38414889 | NRAMP metal ion transporter 2                            |
| <i>Phvul.010G119900</i> | 10           | 40027163 | metal tolerance protein A2                               |
| <i>Phvul.010G119900</i> | 10           | 40027163 | metal tolerance protein A2                               |
| <i>Phvul.010G119900</i> | 10           | 40027163 | metal tolerance protein A2                               |
| <i>Phvul.010G119900</i> | 10           | 40027163 | metal tolerance protein A2                               |
| <i>Phvul.010G128500</i> | 10           | 40925634 | cation calcium exchanger 4                               |
| <i>Phvul.010G160800</i> | 10           | 43922651 | NRAMP metal ion transporter 6                            |
| <i>Phvul.010G160800</i> | 10           | 43922651 | NRAMP metal ion transporter 6                            |
| <i>Phvul.010G160800</i> | 10           | 43922651 | NRAMP metal ion transporter 6                            |
| <i>Phvul.011G058500</i> | 11           | 5228604  | ZIP metal ion transporter family                         |
| <i>Phvul.011G061200</i> | 11           | 5460629  | metal tolerance protein B1                               |
| <i>Phvul.011G061200</i> | 11           | 5460629  | metal tolerance protein B1                               |
| <i>Phvul.011G068500</i> | 11           | 6085721  | Heavy metal transport/detoxification superfamily protein |
| <i>Phvul.011G084200</i> | 11           | 7945552  | Heavy metal transport/detoxification superfamily protein |
| <i>Phvul.011G088100</i> | 11           | 8454876  | vacuolar protein sorting 41                              |
| <i>Phvul.011G178800</i> | 11           | 48990728 | Cation efflux family protein                             |
| <i>Phvul.011G178800</i> | 11           | 48990728 | Cation efflux family protein                             |
| <i>Phvul.L001741</i>    | scaffold_142 | 17190    | Heavy metal transport/detoxification superfamily protein |
| <i>Phvul.L002137</i>    | scaffold_13  | 221624   | Heavy metal transport/detoxification superfamily protein |
| <i>Phvul.L005301</i>    | scaffold_14  | 415497   | YELLOW STRIPE like 1                                     |
| <i>Phvul.L005301</i>    | scaffold_14  | 415497   | YELLOW STRIPE like 1                                     |
| <i>Phvul.L007443</i>    | scaffold_15  | 499839   | zinc transporter 11 precursor                            |
| <i>Phvul.L007543</i>    | scaffold_15  | 504259   | zinc transporter 11 precursor                            |
| <i>Phvul.L011443</i>    | scaffold_15  | 796287   | ZIP metal ion transporter family                         |
