# Supplementary material for: Quantitative Trait Locus Mapping of Marsh Spot Disease Resistance in Cranberry Common Bean (Phaseolus vulgaris L.)
Source: MDPI journal article supplement (doi:10.3390/ijms23147639), 2022-07-11
Supplement: s1 [file s1]

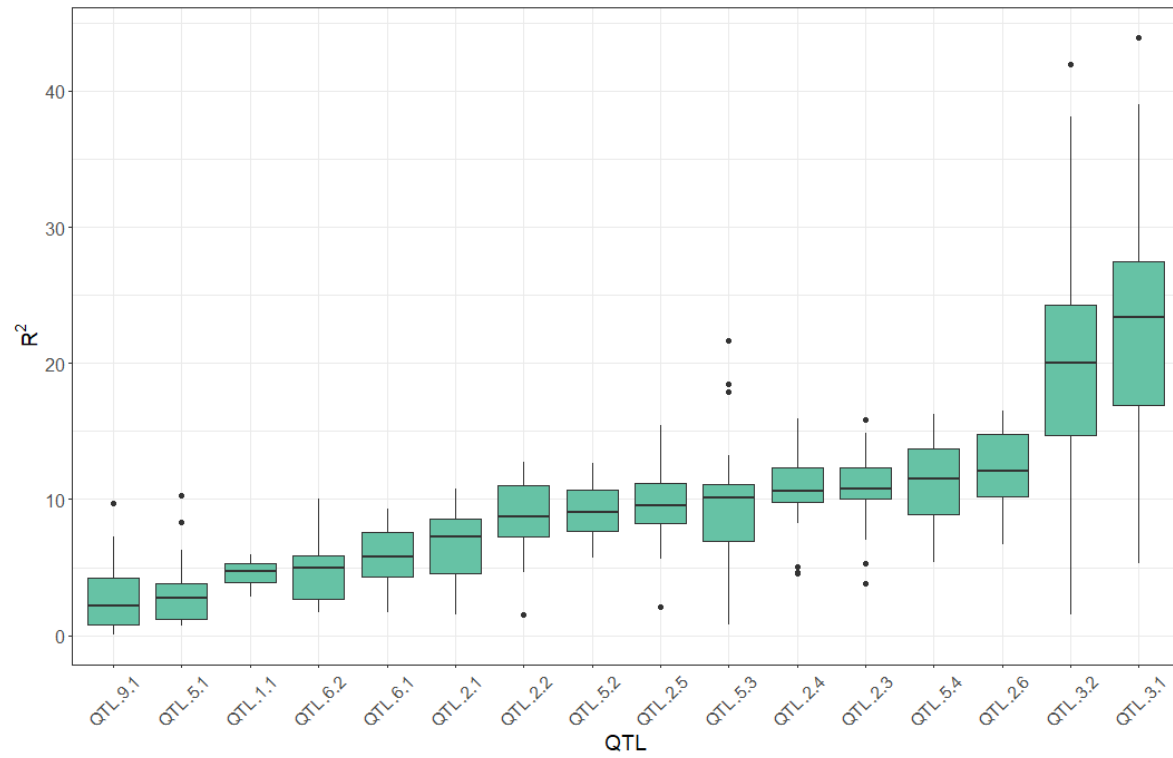

**Figure S3.** Boxplots of  $R^2$  of quantitative trait loci (QTL) in 18 phenotypic data sets. Only  $R^2$  values from the datasets that had significant correlation with QTL were used
