# Supplementary material for: Quantitative Trait Locus Mapping of Marsh Spot Disease Resistance in Cranberry Common Bean (Phaseolus vulgaris L.)
Source: MDPI journal article supplement (doi:10.3390/ijms23147639), 2022-07-11
Supplement: s1 [file s1]

**Table S1.** Statistics of genotyping by sequencing reads generated from the 138 recombinant inbred lines (RILs) and two parents of the cranberry common bean

| Item                         | RILs (138) |         |            |           | Cran09      | Messina     |
|------------------------------|------------|---------|------------|-----------|-------------|-------------|
|                              | Mean       | Min     | Max        | Std       |             |             |
| Total reads                  | 13,064,398 | 420,790 | 42,884,536 | 7,433,013 | 117,779,218 | 105,462,778 |
| Total length (Mb)            | 1,959.66   | 63.12   | 6,432.68   | 1,114.95  | 17,666.88   | 15,819.42   |
| Genome coverage depth        | 3.65       | 0.12    | 11.97      | 2.08      | 32.89       | 29.45       |
| Mapped reads                 | 10,308,751 | 336,808 | 32,483,693 | 5,836,050 | 92,079,813  | 84,434,975  |
| Mapped reads %               | 78.56      | 66.54   | 82.7       | 2.15      | 77.87       | 79.75       |
| Mapped length (Mb)           | 1,546.31   | 50.52   | 4,872.55   | 875.42    | 13,811.97   | 12,665.25   |
| Mapped genome coverage depth | 2.88       | 0.09    | 9.07       | 1.63      | 25.71       | 23.58       |
