# Supplementary material for: Quantitative Trait Locus Mapping of Marsh Spot Disease Resistance in Cranberry Common Bean (Phaseolus vulgaris L.)
Source: MDPI journal article supplement (doi:10.3390/ijms23147639), 2022-07-11
Supplement: s1 [file s1]

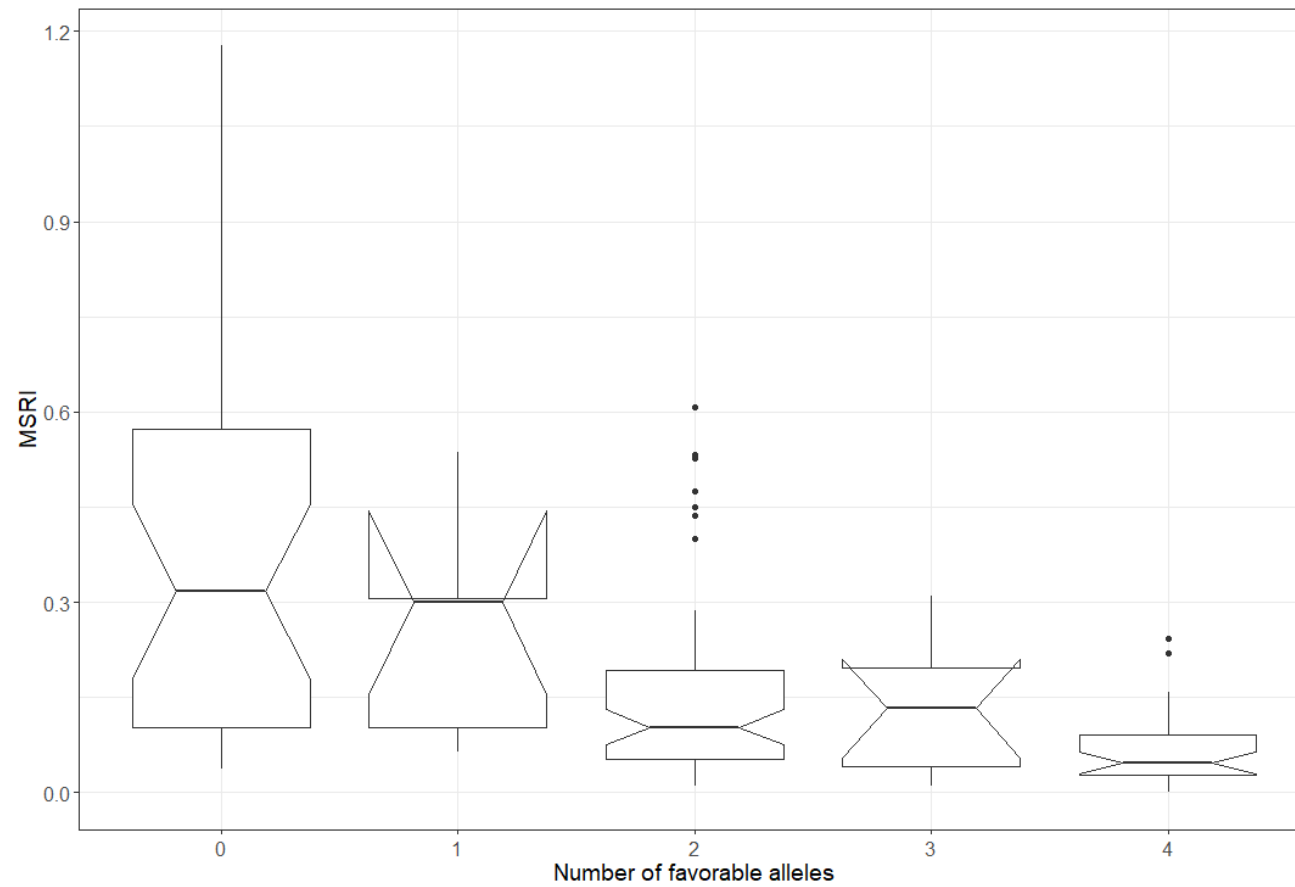

**Figure S4.** Relationship between the number of favorable alleles for three pairs of epistatic quantitative trait loci (QTL) and marsh spot resistance index (MSRI) of the 138 recombinant inbred lines (RILs).
