# Supplementary figures and images for: Quantitative Trait Locus Mapping of Marsh Spot Disease Resistance in Cranberry Common Bean (Phaseolus vulgaris L.)
Source: MDPI journal article supplement (doi:10.3390/ijms23147639), 2022-07-11

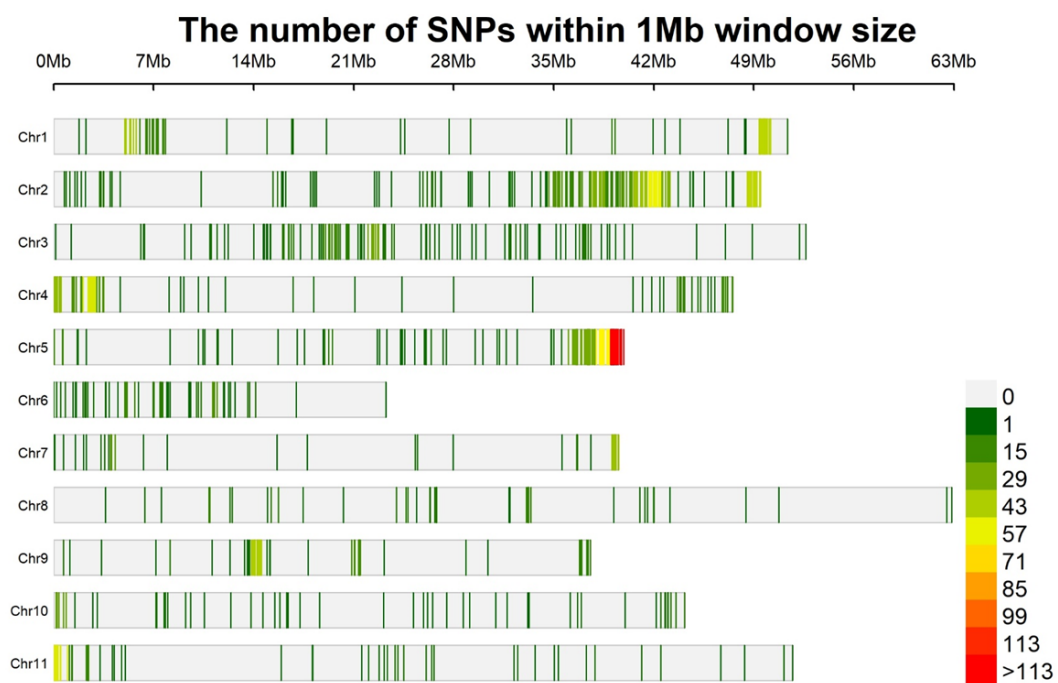

**Figure S1.** Distribution of single nucleotide polymorphisms (SNPs) on 11 common bean chromosomes.

Supplement: s1 [file s1]
